# Supplementary material for: Epidemiology of injuries in elite taekwondo athletes: two Olympic periods cross-sectional retrospective study
Source: PubMed Central journal article supplement — BMJ Open. 2014 Feb 14;4(2):e004605. doi: 10.1136/bmjopen-2013-004605 (PMC3927815; doi:10.1136/bmjopen-2013-004605), 2014-02-14
Supplement: bmjopen-2013-004605.draft_revisions.pdf [file bmjopen-2013-004605.draft_revisions.pdf]

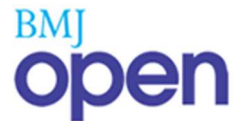

**Epidemiology of injuries in elite taekwondo athletes: two Olympic periods cross-sectional retrospective study**

|                                 |                                                                                                                                                                                                                                                                                                                                                                                                                                                                                                                                                                                                                                                                                                                                                                                                                           |
|---------------------------------|---------------------------------------------------------------------------------------------------------------------------------------------------------------------------------------------------------------------------------------------------------------------------------------------------------------------------------------------------------------------------------------------------------------------------------------------------------------------------------------------------------------------------------------------------------------------------------------------------------------------------------------------------------------------------------------------------------------------------------------------------------------------------------------------------------------------------|
| Journal:                        | <i>BMJ Open</i>                                                                                                                                                                                                                                                                                                                                                                                                                                                                                                                                                                                                                                                                                                                                                                                                           |
| Manuscript ID:                  | bmjopen-2013-004605                                                                                                                                                                                                                                                                                                                                                                                                                                                                                                                                                                                                                                                                                                                                                                                                       |
| Article Type:                   | Research                                                                                                                                                                                                                                                                                                                                                                                                                                                                                                                                                                                                                                                                                                                                                                                                                  |
| Date Submitted by the Author:   | 03-Dec-2013                                                                                                                                                                                                                                                                                                                                                                                                                                                                                                                                                                                                                                                                                                                                                                                                               |
| Complete List of Authors:       | Altarriba-Bartes, Albert; New York Red Bulls, Performance Department; Care and Preventive Sport Unit (UAPE-CAR), Health Consortium of Terrassa - High Performance Sports Center<br>Drobnic, Franchek; FC Barcelona, Medical Services Department; High Performance Sports Center of Sant Cugat del Vallés (CAR), Research Department<br>Til Pérez, Luís; Care and Preventive Sport Unit (UAPE-CAR), Health Consortium of Terrassa - High Performance Sports Center; FC Barcelona, Medical Department<br>Malliaropoulos, Nikolaos; National Track and Field Centre, Sports Medicine Clinic SEGAS<br>Montoro, Bruno; University Hospital of Vall d'Hebron, Pharmacology Department<br>Irurtia Amigó, Alfredo; National Institute of Physical Education of Catalonia, (University of Barcelona) Sports Performance Department |
| <b>Primary Subject Heading</b>: | Sports and exercise medicine                                                                                                                                                                                                                                                                                                                                                                                                                                                                                                                                                                                                                                                                                                                                                                                              |
| Secondary Subject Heading:      | Epidemiology                                                                                                                                                                                                                                                                                                                                                                                                                                                                                                                                                                                                                                                                                                                                                                                                              |
| Keywords:                       | Epidemiology < TROPICAL MEDICINE, SPORTS MEDICINE, REHABILITATION MEDICINE                                                                                                                                                                                                                                                                                                                                                                                                                                                                                                                                                                                                                                                                                                                                                |
|                                 |                                                                                                                                                                                                                                                                                                                                                                                                                                                                                                                                                                                                                                                                                                                                                                                                                           |

SCHOLARONE™  
Manuscripts

1  
2  
3  
4  
5  
6  
7  
8  
9  
10  
11  
12  
13  
14  
15  
16  
17  
18  
19  
20  
21  
22  
23  
24  
25  
26  
27  
28  
29  
30  
31  
32  
33  
34  
35  
36  
37  
38  
39  
40  
41  
42  
43  
44  
45  
46  
47  
48  
49

Table I. OSICS-1: injury type episodes, medical visits and injury severity index according to two Olympic periods and sex of the athletes.

| Injury Location           | Male |     |     |     |            |     | Female |     |     |     |            |     |
|---------------------------|------|-----|-----|-----|------------|-----|--------|-----|-----|-----|------------|-----|
|                           | IE   |     | MV  |     | II (MV/IE) |     | IE     |     | MV  |     | II (MV/IE) |     |
|                           | 1st  | 2nd | 1st | 2nd | 1st        | 2nd | 1st    | 2nd | 1st | 2nd | 1st        | 2nd |
| Ankle                     | 58   | 35  | 105 | 46  | 1,8        | 1,3 | 68     | 44  | 110 | 66  | 1,6        | 1,5 |
| Pelvis <sup>1</sup>       | 8    | 15  | 9   | 15  | 1,1        | 1   | 10     | 8   | 14  | 9   | 1,4        | 1,1 |
| Chest <sup>2</sup>        | 16   | 4   | 19  | 4   | 1,2        | 1   | 1      | 7   | 1   | 9   | 1          | 1,3 |
| Shoulder <sup>3</sup>     | 15   | 14  | 31  | 20  | 2,1        | 1,4 | 7      | 6   | 7   | 8   | 1          | 1,3 |
| Foot                      | 104  | 68  | 160 | 91  | 1,5        | 1,3 | 56     | 57  | 88  | 75  | 1,6        | 1,3 |
| Hip <sup>4</sup>          | 19   | 25  | 39  | 60  | 2,1        | 2,4 | 9      | 10  | 10  | 12  | 1,1        | 1,2 |
| Head and neck             | 10   | 3   | 10  | 4   | 1          | 1,3 | 13     | 13  | 13  | 16  | 1          | 1,2 |
| Knee                      | 83   | 101 | 161 | 186 | 1,9        | 1,8 | 56     | 118 | 71  | 221 | 1,3        | 1,9 |
| Lumbar Spine <sup>5</sup> | 23   | 36  | 33  | 49  | 1,4        | 1,4 | 17     | 35  | 25  | 42  | 1,5        | 1,2 |
| Lower leg                 | 19   | 62  | 25  | 86  | 1,3        | 1,4 | 27     | 40  | 27  | 57  | 1          | 1,4 |
| Thigh                     | 47   | 55  | 66  | 77  | 1,4        | 1,4 | 24     | 66  | 36  | 86  | 1,5        | 1,3 |
| Wrist <sup>6</sup>        | 22   | 53  | 26  | 62  | 1,2        | 1,2 | 17     | 41  | 20  | 48  | 1,2        | 1,2 |
| Unspecific                | 7    | 10  | 7   | 11  | 1          | 1,1 | 6      | 10  | 8   | 10  | 1,3        | 1   |

IE: injury episodes; MV: medical visits; II: injury severity index; 1st: first Olympic period; 2nd: second Olympic period  
<sup>1</sup>Pelvis and buttock; <sup>2</sup>Chest, trunk, abdomen and thoracic spine; <sup>3</sup>Shoulder, upper arm, elbow, forearm; <sup>4</sup>Hip and groin; <sup>5</sup>Lumbar spine; <sup>6</sup>Wrist and hand.

Table II. OSICS-2: injury type episodes, medical visits and injury severity index according to two Olympic periods and sex of the athletes.

| Injury type               | Male |     |     |     |            |     | Female |     |     |     |            |     |
|---------------------------|------|-----|-----|-----|------------|-----|--------|-----|-----|-----|------------|-----|
|                           | IE   |     | MV  |     | II (MV/IE) |     | IE     |     | MV  |     | II (MV/IE) |     |
|                           | 1st  | 2nd | 1st | 2nd | 1st        | 2nd | 1st    | 2nd | 1st | 2nd | 1st        | 2nd |
| Cartilage <sup>1</sup>    | 70   | 73  | 107 | 100 | 1,5        | 1,4 | 66     | 87  | 83  | 136 | 1,3        | 1,6 |
| Luxations <sup>2</sup>    | 78   | 68  | 161 | 137 | 2,1        | 2   | 53     | 64  | 98  | 136 | 1,8        | 2,1 |
| Fractures                 | 26   | 33  | 66  | 45  | 2,5        | 1,4 | 6      | 6   | 7   | 7   | 1,2        | 1,2 |
| Bruising/Hematoma         | 129  | 141 | 175 | 182 | 1,4        | 1,3 | 89     | 133 | 114 | 169 | 1,3        | 1,3 |
| Laceration/Abrasion       | 8    | 2   | 8   | 2   | 1          | 1   | 6      | 2   | 6   | 2   | 1          | 1   |
| Muscle                    | 44   | 72  | 57  | 100 | 1,3        | 1,4 | 31     | 74  | 43  | 88  | 1,4        | 1,2 |
| Nerve                     | 1    | 5   | 1   | 6   | 1          | 1,2 | 1      | 2   | 1   | 2   | 1          | 1   |
| Organic                   | 1    | 1   | 1   | 1   | 1          | 1   | 0      | 1   | 0   | 1   | 0          | 1   |
| Stress <sup>3</sup>       | 14   | 22  | 37  | 53  | 2,6        | 2,4 | 11     | 15  | 13  | 33  | 1,2        | 2,2 |
| Tendon                    | 41   | 40  | 49  | 49  | 1,2        | 1,2 | 31     | 34  | 40  | 40  | 1,3        | 1,2 |
| Non specific <sup>4</sup> | 1    | 2   | 1   | 2   | 1          | 1   | 1      | 2   | 1   | 2   | 1          | 1   |
| Absence                   | 18   | 22  | 28  | 34  | 1,6        | 1,5 | 16     | 35  | 24  | 43  | 1,5        | 1,2 |

IE: injury episodes; MV: medical visits; II: injury severity index; 1st: first Olympic period; 2nd: second Olympic period

<sup>1</sup>Arthritis, cartilage injuries, synovitis, impingements, bursitis and chronic instability; <sup>2</sup>Joint dislocations and joint sprains;

<sup>3</sup>Stress fractures, other stress and overuse injuries; <sup>4</sup>Whiplash and non-specific injuries.

1  
2  
3  
4  
5  
6  
7  
8  
9  
10  
11  
12  
13  
14  
15  
16  
17  
18  
19  
20  
21  
22  
23  
24  
25  
26  
27  
28  
29  
30  
31  
32  
33  
34  
35  
36  
37  
38  
39  
40  
41  
42  
43  
44  
45  
46  
47  
48  
49

Table III. Injury episodes, medical visits and injury severity index according to chronological age groups, related to sex and two Olympic periods.

| Chronological age | Male |     |     |     |            |     | Female |     |     |     |            |     |
|-------------------|------|-----|-----|-----|------------|-----|--------|-----|-----|-----|------------|-----|
|                   | IE   |     | MV  |     | II (MV/IE) |     | IE     |     | MV  |     | II (MV/IE) |     |
|                   | 1st  | 2nd | 1st | 2nd | 1st        | 2nd | 1st    | 2nd | 1st | 2nd | 1st        | 2nd |
| 15                | 3    | 0   | 4   | 0   | 1,3        | 0   | 11     | 4   | 17  | 5   | 1,5        | 1,3 |
| 16                | 23   | 2   | 29  | 3   | 1,3        | 1,5 | 38     | 22  | 53  | 28  | 1,4        | 1,3 |
| 17                | 25   | 22  | 37  | 30  | 1,5        | 1,4 | 58     | 30  | 88  | 44  | 1,5        | 1,5 |
| 18                | 23   | 38  | 36  | 53  | 1,6        | 1,4 | 30     | 56  | 40  | 82  | 1,3        | 1,5 |
| 19                | 31   | 53  | 42  | 78  | 1,4        | 1,5 | 17     | 44  | 26  | 56  | 1,5        | 1,3 |
| 20                | 43   | 49  | 79  | 75  | 1,8        | 1,5 | 4      | 62  | 4   | 82  | 1          | 1,3 |
| 21                | 57   | 37  | 81  | 49  | 1,4        | 1,3 | 18     | 53  | 20  | 104 | 1,1        | 2   |
| 22                | 42   | 24  | 68  | 33  | 1,6        | 1,4 | 26     | 42  | 34  | 64  | 1,3        | 1,5 |
| 23                | 65   | 41  | 98  | 47  | 1,5        | 1,1 | 35     | 43  | 42  | 52  | 1,2        | 1,2 |
| 24                | 44   | 37  | 78  | 66  | 1,8        | 1,8 | 31     | 28  | 45  | 36  | 1,5        | 1,3 |
| 25                | 36   | 50  | 78  | 82  | 2,2        | 1,6 | 23     | 13  | 30  | 15  | 1,3        | 1,2 |
| 26                | 14   | 59  | 28  | 86  | 2          | 1,5 | 10     | 16  | 15  | 18  | 1,5        | 1,1 |
| 27                | 17   | 37  | 22  | 53  | 1,3        | 1,4 | 10     | 22  | 16  | 29  | 1,6        | 1,3 |
| 28                | 6    | 11  | 9   | 20  | 1,5        | 1,8 | 0      | 11  | 0   | 33  | 0          | 3   |
| 29                | 2    | 9   | 2   | 16  | 1          | 1,8 | 0      | 7   | 0   | 8   | 0          | 1,1 |
| 30                | 0    | 12  | 0   | 20  | 0          | 1,7 | 0      | 0   | 0   | 0   | 0          | 0   |
| 31                | 0    | 0   | 0   | 0   | 0          | 0   | 0      | 2   | 0   | 3   | 0          | 1,5 |

IE: injury episodes; MV: medical visits; II: injury severity index; 1st: first Olympic period; 2nd: second Olympic period

Table IV. Injury episodes, medical visits and injury severity index according to the weight category when injury occurred, related to sex and two Olympic periods.

| Year | Male   |    |            |          |    |            |          |    |            |        |    |            |
|------|--------|----|------------|----------|----|------------|----------|----|------------|--------|----|------------|
|      | <58 kg |    |            | 58-68 kg |    |            | 68-80 kg |    |            | >80 kg |    |            |
|      | IE     | MV | II (MV/IE) | IE       | MV | II (MV/IE) | IE       | MV | II (MV/IE) | IE     | MV | II (MV/IE) |
| 1997 | 48     | 87 | 1,8        | 29       | 44 | 1,5        | 44       | 64 | 1,5        | 20     | 27 | 1,4        |
| 1998 | 34     | 49 | 1,4        | 34       | 43 | 1,3        | 38       | 68 | 1,8        | 15     | 23 | 1,5        |
| 1999 | 30     | 55 | 1,8        | 13       | 15 | 1,2        | 21       | 36 | 1,7        | 16     | 26 | 1,6        |
| 2000 | 35     | 57 | 1,6        | 22       | 30 | 1,4        | 13       | 39 | 3          | 19     | 28 | 1,5        |
| 2001 | 33     | 51 | 1,5        | 43       | 63 | 1,5        | 13       | 25 | 1,9        | 24     | 27 | 1,1        |
| 2002 | 54     | 74 | 1,4        | 47       | 83 | 1,8        | 12       | 14 | 1,2        | 10     | 19 | 1,9        |
| 2003 | 47     | 71 | 1,5        | 55       | 86 | 1,6        | 7        | 9  | 1,3        | 17     | 24 | 1,4        |
| 2004 | 44     | 59 | 1,3        | 39       | 57 | 1,5        | 12       | 16 | 1,3        | 24     | 33 | 1,4        |

  

| Year | Male   |    |            |          |    |            |          |    |            |        |    |            |
|------|--------|----|------------|----------|----|------------|----------|----|------------|--------|----|------------|
|      | <49 kg |    |            | 49-57 kg |    |            | 57-67 kg |    |            | >67 kg |    |            |
|      | IE     | MV | II (MV/IE) | IE       | MV | II (MV/IE) | IE       | MV | II (MV/IE) | IE     | MV | II (MV/IE) |
| 1997 | 12     | 23 | 1,9        | 73       | 99 | 1,4        | 20       | 31 | 1,6        | 0      | 0  | 0          |
| 1998 | 13     | 20 | 1,5        | 46       | 67 | 1,5        | 37       | 47 | 1,3        | 3      | 5  | 1,7        |
| 1999 | 14     | 22 | 1,6        | 20       | 25 | 1,3        | 17       | 25 | 1,5        | 2      | 2  | 1          |
| 2000 | 11     | 11 | 1          | 17       | 21 | 1,2        | 18       | 24 | 1,3        | 8      | 8  | 1          |
| 2001 | 34     | 39 | 1,1        | 19       | 24 | 1,3        | 26       | 27 | 1          | 17     | 24 | 1,4        |
| 2002 | 49     | 77 | 1,6        | 22       | 28 | 1,3        | 34       | 58 | 1,7        | 8      | 12 | 1,5        |
| 2003 | 51     | 90 | 1,8        | 24       | 31 | 1,3        | 49       | 70 | 1,4        | 21     | 28 | 1,3        |
| 2004 | 45     | 68 | 1,5        | 16       | 20 | 1,3        | 30       | 38 | 1,3        | 10     | 25 | 2,5        |

IE: injury episodes; MV: medical visits; II: injury severity index

1  
2  
3  
4  
5  
6  
7  
8  
9  
10  
11  
12  
13  
14  
15  
16  
17  
18  
19  
20  
21  
22  
23  
24  
25  
26  
27  
28  
29  
30  
31  
32  
33  
34  
35  
36  
37  
38  
39  
40  
41  
42  
43  
44  
45  
46  
47  
48  
49

Table V. Injury episodes, medical visits and injury severity index according to the months when injury occurred, related to sex and two Olympic periods.

| Months    | Male |     |     |     |            |     | Female |     |     |     |            |     |
|-----------|------|-----|-----|-----|------------|-----|--------|-----|-----|-----|------------|-----|
|           | IE   |     | MV  |     | II (MV/IE) |     | IE     |     | MV  |     | II (MV/IE) |     |
|           | 1st  | 2nd | 1st | 2nd | 1st        | 2nd | 1st    | 2nd | 1st | 2nd | 1st        | 2nd |
| January   | 43   | 47  | 68  | 62  | 1,6        | 1,3 | 47     | 51  | 75  | 71  | 1,6        | 1,4 |
| February  | 55   | 72  | 106 | 127 | 1,9        | 1,8 | 26     | 47  | 42  | 78  | 1,6        | 1,7 |
| March     | 59   | 50  | 92  | 66  | 1,6        | 1,3 | 35     | 47  | 41  | 77  | 1,2        | 1,6 |
| April     | 42   | 50  | 64  | 73  | 1,5        | 1,5 | 40     | 53  | 54  | 87  | 1,4        | 1,6 |
| May       | 52   | 54  | 71  | 83  | 1,4        | 1,5 | 48     | 64  | 64  | 85  | 1,3        | 1,3 |
| June      | 29   | 13  | 40  | 19  | 1,4        | 1,5 | 13     | 20  | 21  | 25  | 1,6        | 1,3 |
| July      | 7    | 30  | 16  | 46  | 2,3        | 1,5 | 4      | 8   | 4   | 10  | 1          | 1,3 |
| August    | 18   | 13  | 23  | 14  | 1,3        | 1,1 | 24     | 23  | 35  | 25  | 1,5        | 1,1 |
| September | 31   | 40  | 48  | 75  | 1,5        | 1,9 | 20     | 32  | 28  | 39  | 1,4        | 1,2 |
| October   | 39   | 31  | 63  | 41  | 1,6        | 1,3 | 28     | 36  | 30  | 65  | 1,1        | 1,8 |
| November  | 42   | 63  | 76  | 86  | 1,8        | 1,4 | 15     | 48  | 21  | 70  | 1,4        | 1,5 |
| December  | 14   | 18  | 24  | 19  | 1,7        | 1,1 | 11     | 26  | 15  | 27  | 1,4        | 1   |

IE: injury episodes; MV: medical visits; II: injury severity index; 1st: first Olympic period; 2nd: second Olympic period

new only

Table VI. Injury episodes, medical visits and injury severity index according to the injury timing when injury occurred, related to two Olympic periods.

| Injury timing                  | IE  |     | MV  |     | II (MV/IE) |     |
|--------------------------------|-----|-----|-----|-----|------------|-----|
|                                | 1st | 2nd | 1st | 2nd | 1st        | 2nd |
| Training                       | 432 | 594 | 612 | 808 | 1,4        | 1,4 |
| Pre-competition                | 188 | 203 | 280 | 303 | 1,5        | 1,5 |
| Competition & Post-competition | 122 | 139 | 229 | 259 | 1,9        | 1,9 |

IE: injury episodes; MV: medical visits; II: injury severity index; 1st: first olympic period; 2nd: second olympic period

Table VII. Injury episodes, medical visits and injury severity index according to the competition difficulty level when injury occurred, related to sex and two Olympic periods.

| Year |            |      | NC   |        | EUC  |        | WC   |        | WCU  |        |
|------|------------|------|------|--------|------|--------|------|--------|------|--------|
|      |            |      | Male | Female | Male | Female | Male | Female | Male | Female |
| 1997 | IE         | Pre  | 15   | 17     | 0    | 0      | 9    | 11     | 15   | 8      |
|      |            | Post | 6    | 6      | 0    | 0      | 4    | 3      | 7    | 4      |
|      | MV         | Pre  | 27   | 25     | 0    | 0      | 11   | 17     | 19   | 12     |
|      |            | Post | 11   | 8      | 0    | 0      | 25   | 3      | 9    | 5      |
|      | II (MV/IE) | Pre  | 1,8  | 1,5    | 0    | 0      | 1,2  | 1,5    | 1,3  | 1,5    |
|      |            | Post | 1,8  | 1,3    | 0    | 0      | 6,3  | 1      | 1,3  | 1,3    |
| 1998 | IE         | Pre  | 11   | 6      | 7    | 6      | 5    | 8      | 4    | 7      |
|      |            | Post | 7    | 6      | 8    | 1      | 9    | 5      | 4    | 3      |
|      | MV         | Pre  | 13   | 7      | 7    | 6      | 10   | 14     | 4    | 8      |
|      |            | Post | 9    | 10     | 29   | 1      | 10   | 11     | 4    | 5      |
|      | II (MV/IE) | Pre  | 1,2  | 1,2    | 1    | 1      | 2    | 1,8    | 1    | 1,1    |
|      |            | Post | 1,3  | 1,7    | 3,6  | 1      | 1,1  | 2,2    | 1    | 1,7    |
| 1999 | IE         | Pre  | 13   | 7      | 0    | 0      | 5    | 3      | 0    | 0      |
|      |            | Post | 6    | 1      | 0    | 0      | 6    | 1      | 0    | 0      |
|      | MV         | Pre  | 17   | 12     | 0    | 0      | 9    | 4      | 0    | 0      |
|      |            | Post | 12   | 1      | 0    | 0      | 12   | 3      | 0    | 0      |
|      | II (MV/IE) | Pre  | 1,3  | 1,7    | 0    | 0      | 1,8  | 1,3    | 0    | 0      |
|      |            | Post | 2    | 1      | 0    | 0      | 2    | 3      | 0    | 0      |
| 2000 | IE         | Pre  | 5    | 3      | 1    | 0      | 8    | 1      | 4    | 9      |
|      |            | Post | 7    | 1      | 8    | 5      | 9    | 1      | 1    | 3      |
|      | MV         | Pre  | 23   | 4      | 1    | 0      | 16   | 1      | 4    | 9      |
|      |            | Post | 19   | 4      | 14   | 6      | 10   | 1      | 1    | 6      |
|      | II (MV/IE) | Pre  | 4,6  | 1,3    | 1    | 0      | 2    | 1      | 1    | 1      |
|      |            | Post | 2,7  | 4      | 1,8  | 1,2    | 1,1  | 1      | 1    | 2      |



|      |            |      |     |     |     |     |     |     |     |     |
|------|------------|------|-----|-----|-----|-----|-----|-----|-----|-----|
| 2001 | IE         | Pre  | 11  | 4   | 0   | 0   | 3   | 2   | 8   | 12  |
|      |            | Post | 9   | 9   | 0   | 0   | 4   | 4   | 0   | 3   |
|      | MV         | Pre  | 11  | 8   | 0   | 0   | 7   | 2   | 9   | 13  |
|      |            | Post | 23  | 10  | 0   | 0   | 4   | 5   | 0   | 3   |
|      | II (MV/IE) | Pre  | 1   | 2   | 0   | 0   | 2,3 | 1   | 1,1 | 1,1 |
|      |            | Post | 2,6 | 1,1 | 0   | 0   | 1   | 1,3 | 0   | 1   |
| 2002 | IE         | Pre  | 16  | 4   | 1   | 10  | 8   | 11  | 4   | 2   |
|      |            | Post | 10  | 5   | 11  | 7   | 13  | 5   | 1   | 1   |
|      | MV         | Pre  | 20  | 4   | 1   | 28  | 26  | 15  | 5   | 2   |
|      |            | Post | 26  | 23  | 18  | 11  | 16  | 6   | 1   | 2   |
|      | II (MV/IE) | Pre  | 1,3 | 1   | 1   | 2,8 | 3,3 | 1,4 | 1,3 | 1   |
|      |            | Post | 2,6 | 4,6 | 1,6 | 1,6 | 1,2 | 1,2 | 1   | 2   |
| 2003 | IE         | Pre  | 13  | 14  | 0   | 0   | 11  | 5   | 0   | 0   |
|      |            | Post | 10  | 10  | 0   | 0   | 4   | 10  | 0   | 0   |
|      | MV         | Pre  | 24  | 17  | 0   | 0   | 13  | 5   | 0   | 0   |
|      |            | Post | 16  | 14  | 0   | 0   | 18  | 25  | 0   | 0   |
|      | II (MV/IE) | Pre  | 1,8 | 1,2 | 0   | 0   | 1,2 | 1   | 0   | 0   |
|      |            | Post | 1,6 | 1,4 | 0   | 0   | 4,5 | 2,5 | 0   | 0   |
| 2004 | IE         | Pre  | 20  | 16  | 10  | 14  | 1   | 3   | 0   | 0   |
|      |            | Post | 6   | 2   | 7   | 7   | 1   | 0   | 0   | 0   |
|      | MV         | Pre  | 29  | 21  | 13  | 24  | 1   | 5   | 0   | 0   |
|      |            | Post | 10  | 2   | 14  | 11  | 1   | 0   | 0   | 0   |
|      | II (MV/IE) | Pre  | 1,5 | 1,3 | 1,3 | 1,7 | 1   | 1,7 | 0   | 0   |
|      |            | Post | 1,7 | 1   | 2   | 1,6 | 1   | 0   | 0   | 0   |

IE: injury episodes; MV: medical visits; II: injury severity index; NC: national championships; EUC: European Championships; WC: World Championships; WCU: World Cups

1  
2  
3  
4  
5  
6  
7  
8  
9  
10  
11  
12  
13  
14  
15  
16  
17  
18  
19  
20  
21  
22  
23  
24  
25  
26  
27  
28  
29  
30  
31  
32  
33  
34  
35  
36  
37  
38  
39  
40  
41  
42  
43  
44  
45  
46  
47  
48  
49

For peer review only

1  
2  
3 **Epidemiology of injuries in elite taekwondo athletes: two Olympic**  
4 **periods cross-sectional retrospective study**  
5  
6  
7

8  
9 **Albert Altarriba-Bartes** <sup>1,2</sup>

10 C/ Costabona 74, 17500 Ripoll (Girona) SPAIN

11 [albertaltarriba@hotmail.com](mailto:albertaltarriba@hotmail.com) or [altarribartes@gmail.com](mailto:altarribartes@gmail.com)

12 +34666911893 or +19733687224  
13  
14  
15  
16  
17  
18  
19

20 **Franchek Drobnic MD, PhD** <sup>3,4</sup>, **Lluís Til MD** <sup>2,4</sup>, **Nikolaos Malliaropoulos MD,**  
21 **MSc, PhD** <sup>5,6</sup>, **José Bruno Montoro PhD** <sup>7</sup>, **Alfredo Irurtia PhD** <sup>8</sup>  
22  
23  
24

25 <sup>1</sup> New York Red Bulls Performance Department, New York, United States of America.

26  
27 <sup>2</sup> Care and Preventive Sport Unit (UAPE-CAR). Health Consortium of Terrassa - High  
28 Performance Sports Center of Sant Cugat del Vallés, Spain.  
29

30  
31 <sup>3</sup> Research Department of High Performance Sports Center, Sant Cugat del Vallés,  
32 Spain.  
33

34  
35 <sup>4</sup> Medical Services of FC Barcelona, Barcelona, Spain.  
36

37  
38 <sup>5</sup> National Track & Field Center, Sports Injury Clinic, Sports Medicine Clinic of  
39 S.E.G.A.S., Thessaloniki, Greece.  
40

41  
42 <sup>6</sup> Thessaloniki Sports Medicine Clinic, Greece.  
43

44  
45 <sup>7</sup> University Hospital of Vall d'Hebron, Pharmacology Department, Barcelona, Spain.  
46

47  
48 <sup>8</sup> National Institute of Physical Education of Catalonia, University of Barcelona, Sports  
49 Performance Department, Barcelona, Spain.  
50

51  
52 Olympics, Martial Arts, Taekwondo, Sporting injuries, Epidemiology, Injury Prevention  
53  
54  
55

56 *Word count – 2854 words*  
57  
58  
59  
60

## ABSTRACT

**Background:** Taekwondo is a popular Korean martial art characterised by its emphasis on dynamic kicking techniques. Taekwondo has been included in the Olympic Games program since 2000 Sydney Olympic Games. Although it is becoming an increasingly popular sport, there is a lack of reliable epidemiologic data on Taekwondo injuries.

**Aim:** This analytical cross-sectional retrospective cohort study aims to describe reported Taekwondo injuries and to determine the prevalence, characteristics and possible injury risk factors sustained by the Spanish National Team athletes. Additionally, we compared each identified risk factor with its relation to injury location and type.

**Methods:** This study was a summation of two Olympic periods, eight years, of data of injury reports, which included 1678 injury episodes. The data were collected on standardized injury reports at time of the first medical visit. The data analysis was performed at the High Performance Sports Center in Sant Cugat del Vallés (Barcelona, Spain).

**Results:** Lower limb injuries are more common than upper limb injuries. Contusions, joint and cartilage injuries are the prevailing types of injury. Chronological age and the weight categories can be considered as risk factors to sustain injuries in male and female elite taekwondist according to their location and type.

**Conclusions:** The present study provides epidemiological information that will help to inform future injury surveillance studies and the development of prevention strategies and recommendations to reduce the number of injuries in taekwondo competition.

## STRENGTHS AND LIMITATIONS

- A large analytical cross-sectional study over a 8-year period and the new findings of different associations between risk factors to sustain an injury and its location and type in elite taekwondo athletes were among the main strengths.
- Retrospective nature and unavailability of some relevant data.

For peer review only

## INTRODUCTION

Taekwondo is a systematic and scientific Korean age-old martial art that involves multiple physical fighting skills. This fully recognized Olympic sport is regulated by the World Taekwondo Federation and is considered one of the most worldwide popular sports, with a range of 75 to 120 million practitioners in more than 140 countries. Spain is in the top of current medals ranking in the last London 2012 Olympic Games and represent one of the most traditional countries in terms of international sporting success [1].

Taekwondo competitive performance depends on several factors, including physical [2-6], psychological [7, 8], technical [9, 10], and tactical [11-13]. Their practitioners compete according to sex and defined weight categories classification in a full-contact event of two opponents divided in three semi-continuous rounds of two minutes, with one minute's rest between rounds. Taekwondists are equipped with a padded trunk protector, protective padded headgear, protective gloves, and shin guards. Victory is achieved by higher scores given by judges for the specific fighting techniques allowed (kicks and punches), accurately and powerfully, in the legal scoring areas (the abdomen and both sides of the flank; the permitted parts of the face).

Understanding the injury pattern of a particular sport and its inherent risk factors, is a key area of current sports medicine [14]. As within many other combat sports, there is a high potential for injury associated with elite athletic performance in taekwondo [15-21]. Defining injury as any circumstance for which the athlete sought the assistance of the on-site medical personnel, the latest reviews about competition injuries in taekwondo concluded that total injury rates for elite men ranged from 20.6 to 139.5 per 1000 athlete-exposure (A-E), and for elite women between 25.3 to 105.5 per

1  
2  
3 1000 A–E. When only time-loss injuries are contemplated, rates for men varied from  
4  
5 6.9 to 33.6 per 1000 A–E and for women from 2.4 to 23.0 per 1000 A–E [20].  
6  
7

8  
9 The main injury mechanism in taekwondo is the direct contact, especially  
10 through the exchange of accurate turning kicks and poorly performed or nonexistent  
11 blocking skills [17, 20, 22, 23]. The vast majority of all injuries are localized to the  
12 lower extremities, especially in the instep of the foot, and these are contusions, sprains  
13 and muscle strains [17, 20, 24, 25]. The head and the neck regions are the next  
14 anatomical locations with an increased prevalence in taekwondo competition injuries  
15 [17, 20].  
16  
17  
18  
19  
20  
21  
22  
23

24  
25 Despite the well-documented epidemiology injury profile in taekwondo  
26 competition, relatively few studies have evaluated the incidence of injury risk factors  
27 related to the training process and long-term preparation in elite level. The main  
28 objective of this eight years cross-sectional retrospective cohort study was to determine  
29 the prevalence, characteristics (anatomical location and injury type), and possible injury  
30 risk factors sustained by male and female Spanish National Team (SNT) taekwondists  
31 trained in the High Performance Sports Center (CAR) in Sant Cugat del Vallés  
32 (Barcelona, Spain) throughout two different Olympic periods (Sydney 1997 – 2000 and  
33 Athens 2001 – 2004).  
34  
35  
36  
37  
38  
39  
40  
41  
42  
43  
44

## 45 46 **METHODS**

### 47 48 **Type of study**

49  
50 This study is a large analytical cross-sectional retrospective cohort study over eight  
51 years, divided into two different four years Olympic periods (OP).  
52  
53  
54  
55  
56  
57  
58  
59  
60

### Study participants

From the 1<sup>st</sup> of January 1997 through the 31<sup>st</sup> of December 2004, a total of 48 taekwondo athletes from the SNT were studied. There were 22 male and 26 female athletes (45.8% and 54.2% of all athletes, respectively). The mean (+SD) age of the athletes in this study was 21.6±1.2 years (minimum=15 years, maximum=31 years). The inclusion criteria were 1) to have trained for the national taekwondo group for a minimum of one sports season, and 2) being a member of the SNT.

### Data collection and injury report form

Two data sources were utilized. The first source was a comprehensive database obtained from the CAR, to provide personal and general information about each athlete. The second data source was from an electronic medical data capture system from the CAR sports medical department. This contained the following data fields in an unidentified format: athlete accreditation number, sex, age, date of first registration at CAR, weights category, medical visit date (day/month/year), and injury diagnosis. All injuries were diagnosed by sports medicine doctors, and subsequently recorded by anatomical location (OSICS-1) and injury type (OSICS-2) according to Orchard Sports Injury Classification System, V.10 (OSICS-10) [26]. The system of data entry and storage complied with existing European Union standards for medical data storage [27].

### Procedures

The total number of injury episodes (n=1678; males: n=912; females: n=766) were obtained and analysed individually for every elite taekwondist classified by sex and OP. Definition of injury episodes (IE) corresponds to the series of medical visits sustained by an athlete, related to the same injury (same OSICS coding) and occurred no more than two months apart from each other. If the time between them is greater than two months, this is classified as a new episode. We determined this length of time according



1  
2  
3 to the definition of reinjury proposed by Hagglund [28]: “an injury of the same type and  
4 location of a previous injury that occurred within two months of the final rehabilitation  
5 day of the previous injury”. Additionally, has been included a severity index of injuries,  
6 based on the number of medical visits (MV) generated by an IE (more MV, more injury  
7 severity). Results related to MV are shown as online supplement data.  
8  
9

10  
11  
12  
13  
14 Analysed variables used were: chronological age (expressed in years, and three  
15 age groups: from 15 to 20 years old, 21 to 25 years old, and 26 to 31 years old); weight  
16 category (very light, light, medium, and heavy); annual quarter when injury occurs;  
17 injury timing (pre-competition: fifteen days before the beginning of the competition;  
18 competition and/or post-competition: all the injuries sustained in competition and/or  
19 within the next fifteen days after the last day of competition; out of competition or  
20 during training sessions); competition difficulty level (World Championships –WC–,  
21 World Cups –WCU–, European Championships –EUC–, National Championships –  
22 WC–), which includes as pre-competition injuries all the injuries registered during the  
23 fifteen days before the first day of competition and as post-competition injuries all the  
24 injuries registered during the days of competition and/or within the next fifteen days  
25 after the last day of competition.  
26  
27  
28  
29  
30  
31  
32  
33  
34  
35  
36  
37  
38  
39  
40  
41

### 42 **Definition of injury**

43  
44 This study adhered to the operational injury definitions recommended by Junge *et al.*,  
45 [14], thus an injury was defined as new or recurring musculoskeletal complaints or  
46 concussions incurred during competition or training receiving medical attention,  
47 regardless of time loss from competition or training.  
48  
49  
50  
51  
52

### 53 **Confidentiality and ethical approval**

54  
55 Research ethics approval was obtained from the Ethics Sports Clinical Investigations  
56 Committee of Catalonia (ID-0099S/10308/2011). The investigators obtained the  
57  
58  
59  
60

1  
2  
3 informed consent from the subjects to access and collect past medical history data and  
4  
5 voluntarily participated in the study. All data were stored on highly secured, password-  
6  
7 protected files. The investigators signed a confidentiality agreement that states all data  
8  
9 gathered during the duration of the study will be utilized solely for the purpose of the  
10  
11 investigation.  
12

### 13 14 15 **Statistical analysis**

16  
17 Data are expressed as the number of IE and presented by the standard basic descriptive  
18  
19 statistics of mean and standard deviation. The injury classification (OSICS-1:  
20  
21 anatomical location; OSICS-2: injury type) and the independent variables  
22  
23 (chronological age, weight category, annual quarter, injury timing, competition  
24  
25 difficulty level) were analysed in relation to sex and OP. In order to compare the  
26  
27 differences between both OP or between sexes, a Student's t-test or analogue non-  
28  
29 parametric Mann-Whitney U test were performed, depending on whether the data were  
30  
31 normally distributed or not, respectively. In order to analyze the probability of  
32  
33 considering a risk factor, or a possible behavior-dependent generator between the  
34  
35 injuries (by the criterion of OSICS classification) and each of the independent variables,  
36  
37 we used the Pearson Chi-squared test. We regarded two-tailed p values  $\leq 0.05$  as  
38  
39 significant. All statistical modeling was performed using SPSS® 19.0 (SPSS Inc.  
40  
41 Chicago, USA).  
42  
43  
44  
45  
46  
47

## 48 **RESULTS**

### 49 50 **OSICS-1 classification (anatomical sites)**

51  
52 Independently of sex or OP, the anatomical sites (OSICS-1) with more IE, are (Table 1):  
53  
54 knee, foot, thigh, ankle, and lower leg.  
55  
56  
57  
58  
59  
60

Table 1. OSICS 1: injury location episodes according to two Olympic periods and sex of the athletes.

| Injury location           | Males           |      |                 |      | Females         |      |                 |      |
|---------------------------|-----------------|------|-----------------|------|-----------------|------|-----------------|------|
|                           | 1 <sup>st</sup> |      | 2 <sup>nd</sup> |      | 1 <sup>st</sup> |      | 2 <sup>nd</sup> |      |
|                           | (n)             | (%)  | (n)             | (%)  | (n)             | (%)  | (n)             | (%)  |
| Ankle                     | 58              | 13.5 | 35              | 7.3  | 68              | 21.9 | 44              | 9.7  |
| Pelvis <sup>1</sup>       | 8               | 1.9  | 15              | 3.1  | 10              | 3.2  | 8               | 1.8  |
| Chest <sup>2</sup>        | 16              | 3.7  | 4               | 0.8  | 1               | 0.3  | 7               | 1.5  |
| Shoulder <sup>3</sup>     | 15              | 3.5  | 14              | 2.9  | 7               | 2.3  | 6               | 1.3  |
| Foot                      | 104             | 24.1 | 68              | 14.1 | 56              | 18.0 | 57              | 12.5 |
| Hip <sup>4</sup>          | 19              | 4.4  | 25              | 5.2  | 9               | 2.9  | 10              | 2.2  |
| Head and neck             | 10              | 2.3  | 3               | 0.6  | 13              | 4.2  | 13              | 2.9  |
| Knee                      | 83              | 19.3 | 101             | 21.0 | 56              | 18.0 | 118             | 25.9 |
| Lumbar Spine <sup>5</sup> | 23              | 5.3  | 36              | 7.5  | 17              | 5.5  | 35              | 7.7  |
| Lower leg                 | 19              | 4.4  | 62              | 12.9 | 27              | 8.7  | 40              | 8.8  |
| Thigh                     | 47              | 10.9 | 55              | 11.4 | 24              | 7.7  | 66              | 14.5 |
| Wrist <sup>6</sup>        | 22              | 5.1  | 53              | 11.0 | 17              | 5.5  | 41              | 9.0  |
| Unspecific                | 7               | 1.6  | 10              | 2.1  | 6               | 1.9  | 10              | 2.2  |

n: number of injury episodes; 1<sup>st</sup> (1997-2000); 2<sup>nd</sup> (2001-2004); <sup>1</sup>Pelvis and buttock; <sup>2</sup>Chest, trunk, abdomen and thoracic spine; <sup>3</sup>Shoulder, upper arm, elbow, forearm; <sup>4</sup>Hip and groin; <sup>5</sup>Lumbar spine; <sup>6</sup>Wrist and hand.

### OSICS-2 classification (injury type)

Independently of sex or OP, the type of injury (OSICS-2) with more IE, are (Table 2): bruising/hematomas (contusions); joint dislocations and joint sprains; arthritis, cartilage injuries, synovitis, impingements, bursitis and chronic instability; muscle injuries; tendon injuries.

Table 2. OSICS-2: injury type episodes according to two Olympic periods and sex of the athletes.

| Injury type               | Males           |      |                 |      | Females         |      |                 |      |
|---------------------------|-----------------|------|-----------------|------|-----------------|------|-----------------|------|
|                           | 1 <sup>st</sup> |      | 2 <sup>nd</sup> |      | 1 <sup>st</sup> |      | 2 <sup>nd</sup> |      |
|                           | (n)             | (%)  | (n)             | (%)  | (n)             | (%)  | (n)             | (%)  |
| Cartilage <sup>1</sup>    | 70              | 16.2 | 73              | 15.2 | 66              | 21.2 | 87              | 19.1 |
| Luxations <sup>2</sup>    | 78              | 18.1 | 68              | 14.1 | 53              | 17.0 | 64              | 14.1 |
| Fractures                 | 26              | 6.0  | 33              | 6.9  | 6               | 1.9  | 6               | 1.3  |
| Bruising/Hematoma         | 129             | 29.9 | 141             | 29.3 | 89              | 28.6 | 133             | 29.2 |
| Laceration/Abrasion       | 8               | 1.9  | 2               | 0.4  | 6               | 1.9  | 2               | 0.4  |
| Muscle                    | 44              | 10.2 | 72              | 15.0 | 31              | 10.0 | 74              | 16.3 |
| Nerve                     | 1               | 0.2  | 5               | 1.0  | 1               | 0.3  | 2               | 0.4  |
| Organic                   | 1               | 0.2  | 1               | 0.2  | 0               | 0.0  | 1               | 0.2  |
| Stress <sup>3</sup>       | 14              | 3.2  | 22              | 4.6  | 11              | 3.5  | 15              | 3.3  |
| Tendon                    | 41              | 9.5  | 40              | 8.3  | 31              | 10.0 | 34              | 7.5  |
| Non specific <sup>4</sup> | 1               | 0.2  | 2               | 0.4  | 1               | 0.3  | 2               | 0.4  |
| Absence                   | 18              | 4.2  | 22              | 4.6  | 16              | 5.1  | 35              | 7.7  |

n: number of injury episodes; 1<sup>st</sup> (1997-2000); 2<sup>nd</sup> (2001-2004); <sup>1</sup>Arthritis, cartilage injuries, synovitis, impingements, bursitis and chronic instability; <sup>2</sup>Joint dislocations and joint sprains; <sup>3</sup>Stress fractures, other stress and overuse injuries; <sup>4</sup>Whiplash and non-specific injuries.

### Chronological age

IE significant differences were found between sexes during the first OP, in the chronological age groups of 21 to 25 years old (males: 48.8±11.9 vs females: 26.6±6.7; p=0.03). Independently of the different OP, chronological ages recorded a greater number of IE, are (Table 3): 23-24 years old for males (IE: 20.5%; n=187) and 17-18 years old for females (IE: 22.7% ; n=174). With the numbers available, seems to exist a sufficiently high injury prevalence in anatomical locations (OSICS-1) or injury types (OSICS-2) as for consider a behavior susceptible to be dependent. Therefore, the chronological age seems to condition a specific injury pattern related to determined anatomical locations or injury types (Table 5).

Table 3. Injury episodes according to chronological age groups, related to sex and two Olympic periods.

| Chronological age | Males           |      |                 |      | Females         |      |                 |      |
|-------------------|-----------------|------|-----------------|------|-----------------|------|-----------------|------|
|                   | 1 <sup>st</sup> |      | 2 <sup>nd</sup> |      | 1 <sup>st</sup> |      | 2 <sup>nd</sup> |      |
|                   | (n)             | (%)  | (n)             | (%)  | (n)             | (%)  | (n)             | (%)  |
| 15                | 3               | 0,8  | 0               | 0,0  | 11              | 3,5  | 4               | 0,9  |
| 16                | 23              | 5,3  | 2               | 0,4  | 38              | 12,2 | 22              | 4,8  |
| 17                | 25              | 5,8  | 22              | 4,6  | 58              | 18,6 | 30              | 6,6  |
| 18                | 23              | 5,3  | 38              | 7,9  | 30              | 9,6  | 56              | 12,3 |
| 19                | 31              | 7,2  | 53              | 11,0 | 17              | 5,5  | 44              | 9,7  |
| 20                | 43              | 10,0 | 49              | 10,2 | 4               | 1,3  | 62              | 13,6 |
| 21                | 57              | 13,2 | 37              | 7,6  | 18              | 5,8  | 53              | 11,6 |
| 22                | 42              | 9,7  | 24              | 5,0  | 26              | 8,4  | 42              | 9,3  |
| 23                | 65              | 15,1 | 41              | 8,5  | 35              | 11,3 | 43              | 9,5  |
| 24                | 44              | 10,2 | 37              | 7,7  | 31              | 10,0 | 28              | 6,2  |
| 25                | 36              | 8,4  | 50              | 10,4 | 23              | 7,4  | 13              | 2,9  |
| 26                | 14              | 3,2  | 59              | 12,3 | 10              | 3,2  | 16              | 3,5  |
| 27                | 17              | 3,9  | 37              | 7,7  | 10              | 3,2  | 22              | 4,8  |
| 28                | 6               | 1,4  | 11              | 2,3  | 0               | 0,0  | 11              | 2,4  |
| 29                | 2               | 0,5  | 9               | 1,9  | 0               | 0,0  | 7               | 1,5  |
| 30                | 0               | 0,0  | 12              | 2,5  | 0               | 0,0  | 0               | 0,0  |
| 31                | 0               | 0,0  | 0               | 0,0  | 0               | 0,0  | 2               | 0,4  |

n: number of injury episodes; 1<sup>st</sup> (1997 - 2000); 2<sup>nd</sup> (2001-2004).

### Weight category

Independently of the OP analysed, the male weight category group which has more IE, is the under 58 kg (IE: 35.6%; n=325). Then, from 58 to 68 kg (IE: 30.9%; n=282), from 68 to 80 kg (IE: 17.6%; n=160), and more than 80 kg (IE: 15.9%; n=145). In females, is the light weight category from 49 to 57 kg the one with more IE (IE: 30.9%; n=237). The next distribution per weight groups is: from 57 to 67 kg (IE: 30.2%; n=231), under 49 kg (IE: 29.9%; n=229), and more than 67 kg (IE: 9.0%; n=69). Significant differences ( $p=0.03$ ), were found between sexes in all weight categories (in the very light and heavy weight categories during the first OP, and in the light and medium weight category during the second OP) and between OP in the same sex: females in very light and heavy weight categories and males in light and medium weight categories. Once again, with the available data, seems to exist a sufficiently high injury

prevalence in anatomical locations (OSICS-1) or injury types (OSICS-2) to consider a behavior susceptible to be dependent. Therefore, the weight category should be considered as a risk factor or a possible behavior-dependent generator (Table 5).

### Annual quarter

From the total of 912 IE generated by the males (Table 4), 35.7% (n=326) were sustained for the athletes in the first annual quarter, 26.3% (n=240) in the second annual quarter, 15.3% (n=139) in the third annual quarter, and 22.7% (n=207) in the fourth annual quarter. From the total of 766 IE generated by the females (Table 4), 33.0% (n=253) were sustained for the athletes in the first annual quarter, 31.1% (n=238) in the second annual quarter, 14.5% (n=111) in the third annual quarter, and 21.4% (n=164) in the fourth annual quarter.

Table 4. Injury episodes according to the months when injury occurred, related to sex and two Olympic periods.

| Months    | Males           |      |                 |      | Females         |      |                 |      |
|-----------|-----------------|------|-----------------|------|-----------------|------|-----------------|------|
|           | 1 <sup>st</sup> |      | 2 <sup>nd</sup> |      | 1 <sup>st</sup> |      | 2 <sup>nd</sup> |      |
|           | (n)             | (%)  | (n)             | (%)  | (n)             | (%)  | (n)             | (%)  |
| January   | 43              | 10,0 | 47              | 9,8  | 47              | 15,1 | 51              | 11,2 |
| February  | 55              | 12,8 | 72              | 15,0 | 26              | 8,4  | 47              | 10,3 |
| March     | 59              | 13,7 | 50              | 10,4 | 35              | 11,3 | 47              | 10,3 |
| April     | 42              | 9,7  | 50              | 10,4 | 40              | 12,9 | 53              | 11,6 |
| May       | 52              | 12,1 | 54              | 11,2 | 48              | 15,4 | 64              | 14,1 |
| June      | 29              | 6,7  | 13              | 2,7  | 13              | 4,2  | 20              | 4,4  |
| July      | 7               | 1,6  | 30              | 6,2  | 4               | 1,3  | 8               | 1,8  |
| August    | 18              | 4,2  | 13              | 2,7  | 24              | 7,7  | 23              | 5,2  |
| September | 31              | 7,2  | 40              | 8,3  | 20              | 6,4  | 32              | 7,0  |
| October   | 39              | 9,0  | 31              | 6,4  | 28              | 9,0  | 36              | 7,9  |
| November  | 42              | 9,7  | 63              | 13,1 | 15              | 4,8  | 48              | 10,5 |
| December  | 14              | 3,3  | 18              | 3,8  | 11              | 3,5  | 26              | 5,7  |

n: number of injury episodes; 1<sup>st</sup> (1997-2000); 2<sup>nd</sup> (2001-2004).

No differences were found between sexes or OP. Excluding the results obtained by male takwondists during the first OP, the annual quarter seems to condition a significant

1  
2  
3 prevalence of injury anatomical site (OSICS-1) and injury type (OSICS-2), and could be  
4  
5 considered as a injury risk factor (Table 5).  
6  
7

### 8 9 **Injury timing**

10 From the total of 1678 IE, 61.1% were sustained or during training sessions or out of  
11  
12 competition (n=1026), 23.3% in pre-competition period (n=391) and 15.6% in  
13  
14 competition or post-competition period (n=261). No differences exist between OP  
15  
16 according to the number of IE. In males, there is no significant relationship between  
17  
18 injury timing and injury anatomical sites (OSICS-1) or injury types (OSICS-2).  
19  
20 Therefore, with the numbers available, only in females this variable should be  
21  
22 considered as a injury risk factor (Table 5).  
23  
24  
25  
26  
27

### 28 **Competition difficulty level**

29 From the total of 367 IE derived from competition in males, 45.2% (n=166) were  
30  
31 sustained during NC, 14.4% (n=53) during EUC, 27.2% (n=100) during WC, and  
32  
33 13.1% (n=48) during WCU. From the total of 286 IE derived from competition in  
34  
35 females, 38.8% (n=111) were sustained during NC, 17.5% (n=50) during EUC, 25.5%  
36  
37 (n=73) during WC, and 18.2% (n=52) during WCU. No differences exist between OP  
38  
39 according to the number of IE in relation to the competition difficulty level. There is no  
40  
41 significant relationship between competition difficulty level and injury anatomical sites  
42  
43 (OSICS-1) or injury types (OSICS-2) . These results are independent of whether the  
44  
45 injury has occurred pre or post-competition (Table 5). So, with current data, the  
46  
47 competition difficulty level should not be considered as a risk factor or a possible  
48  
49 behavior-dependent generator of injuries in elite Taekwondo athletes.  
50  
51  
52  
53  
54  
55  
56  
57  
58  
59  
60

Table 5. Statistical dependency levels of independent variables according to sex and two different Olympic periods.

|                              | Sex                          | OSICS   | Olympic period  | IE (n)          | df              | $\chi^2$ | <i>p</i> |       |       |
|------------------------------|------------------------------|---------|-----------------|-----------------|-----------------|----------|----------|-------|-------|
| Chronological age            | Males                        | 1       | 1 <sup>st</sup> | 431             | 24              | 43.04    | 0.005    |       |       |
|                              |                              | 2       |                 |                 | 22              | 40.99    | 0.005    |       |       |
|                              |                              | Females | 1               | 2 <sup>nd</sup> | 481             | 24       | 48.71    | 0.001 |       |
|                              |                              |         | 2               |                 |                 | 22       | 49.81    | 0.001 |       |
|                              | Weight category              | Males   | 1               | 1 <sup>st</sup> | 431             | 36       | 131.56   | 0.001 |       |
|                              |                              |         | 2               |                 |                 | 33       | 53.38    | 0.005 |       |
| Females                      |                              |         | 1               | 2 <sup>nd</sup> | 481             | 36       | 348.18   | 0.001 |       |
|                              |                              |         | 2               |                 |                 | 33       | 188.11   | 0.001 |       |
| Annual quarter               |                              | Males   | 1               | 1 <sup>st</sup> | 431             | 36       | 140.39   | 0.001 |       |
|                              |                              |         | 2               |                 |                 | 33       | 86.83    | 0.001 |       |
|                              | Females                      |         | 1               | 2 <sup>nd</sup> | 455             | 36       | 170.15   | 0.001 |       |
|                              |                              |         | 2               |                 |                 | 33       | 128.78   | 0.001 |       |
|                              | Injury timing                | Males   | 1               | 1 <sup>st</sup> | 431             | 36       | 34.57    | 0.500 |       |
|                              |                              |         | 2               |                 |                 | 33       | 27.50    | 0.700 |       |
| Females                      |                              |         | 1               | 2 <sup>nd</sup> | 481             | 36       | 245.14   | 0.001 |       |
|                              |                              |         | 2               |                 |                 | 33       | 110.42   | 0.001 |       |
| Competition difficulty level |                              | Males   | 1               | 1 <sup>st</sup> | 311             | 36       | 114.17   | 0.001 |       |
|                              |                              |         | 2               |                 |                 | 33       | 72.07    | 0.001 |       |
|                              | Females                      |         | 1               | 2 <sup>nd</sup> | 455             | 36       | 83.60    | 0.001 |       |
|                              |                              |         | 2               |                 |                 | 33       | 72.89    | 0.001 |       |
|                              | Competition difficulty level | Males   | Pre             | 1               | 1 <sup>st</sup> | 102      | 36       | 41.56 | 0.200 |
|                              |                              |         |                 | 2               |                 |          | 33       | 22.01 | 0.900 |
| Post                         |                              |         | 1               | 2 <sup>nd</sup> | 106             | 36       | 44.7     | 0.100 |       |
|                              |                              |         | 2               |                 |                 | 33       | 27.41    | 0.700 |       |
| Females                      |                              | Pre     | 1               | 1 <sup>st</sup> | 82              | 36       | 27.82    | 0.850 |       |
|                              |                              |         | 2               |                 |                 | 33       | 24.29    | 0.850 |       |
|                              |                              | Post    | 1               | 2 <sup>nd</sup> | 76              | 36       | 28.80    | 0.750 |       |
|                              |                              |         | 2               |                 |                 | 33       | 33.76    | 0.400 |       |
| Competition difficulty level | Pre                          | 1       | 1 <sup>st</sup> | 86              | 36              | 40.83    | 0.250    |       |       |
|                              |                              | 2       |                 |                 | 33              | 40.27    | 0.150    |       |       |
|                              | Post                         | 1       | 2 <sup>nd</sup> | 97              | 36              | 42.67    | 0.200    |       |       |
|                              |                              | 2       |                 |                 | 33              | 12.53    | 0.990    |       |       |
| Competition difficulty level | Pre                          | 1       | 1 <sup>st</sup> | 40              | 36              | 15.46    | 0.990    |       |       |
|                              |                              | 2       |                 |                 | 33              | 17.98    | 0.975    |       |       |
|                              | Post                         | 1       | 2 <sup>nd</sup> | 63              | 36              | 22.37    | 0.950    |       |       |
|                              |                              | 2       |                 |                 | 33              | 19.62    | 0.950    |       |       |

OSICS: (1) injury location, (2) injury type; IE: injury episodes; n: number of injury episodes; *df*: degrees of freedom;  $\chi^2$ : chi-square statistic; *p*: significance level; Pre: 1<sup>st</sup> (1997 - 2000); 2<sup>nd</sup> (2001-2004).



## DISCUSSION

The present study examine the effect of chronological age, weight category, annual quarter, injury timing, and competition difficulty level on injury location and type in elite Taekwondo athletes. The anatomical sites with more injury incidence correspond to the lower limbs (knee, foot, thigh, ankle, and lower leg) for both males and females. These anatomical locations are related to different injury types, prevailing contusions, joint and cartilage injuries and, in smaller proportion, tendon and muscle injuries. Chronological age and weight category are the unique variables that, independently to sex and Olympic period, show a statistically significant relation as possible injury risk factors in elite taekwondo. In the opposite direction, the competition difficulty level does not seem to have any relationship with the injury prevalence in this combat sport. Annual quarter and injury timing show different possible dependent behaviors according to each sex or different Olympic periods.

The present study has some limitations to be considered. First, and perhaps the most important, not correspond to a prospective and/or longitudinal study design (it was not possible, for example, to determine when the injury exactly occurred, or to calculate injury rates with adequate accuracy, or to possess previous injury information, or a training load indicator). Second, despite the high number of IE, there is a low number of taekwondists included that can possibly result in relevant bias.

### *Injury location (OSICS-1) and injury type (OSICS-2)*

Spanish males taekwondists present higher IE than women, however there is no statistically proven difference found. Recent studies reported similar findings [29-35]. Past research cites the most common injury locations as the lower limb [17, 24, 31, 32, 34, 38, 39]. This is not surprising due to the use of the lower limb as the primary striking weapon. There are no significance differences between sexes in knee injuries,

1  
2  
3 that's a surprising finding because according to many research papers being a female is  
4 a risk factor to suffer from more knee injuries [40-42]. It could be possible that this risk  
5 factor is minimized because both sexes train and do the same prevention programs, an  
6 uncommon aspect in other sports. Foot is the second location with more number of  
7 episodes, not rear if we know that the majority of kick techniques use the foot. Some  
8 authors affirm that 98 out of 100 hundred kicking techniques are executed with the foot  
9 [43, 44]. Chest, thoracic column and abdomen are the locations with less number of  
10 episodes, it could be related to the use of protections in these zones during training  
11 sessions and competitions. The prevalence of contusions, joint and cartilage injuries, is  
12 in accordance with the related literature [26, 30]. It's logical because the practitioners  
13 are constantly kicking each other.

14  
15  
16  
17  
18  
19  
20  
21  
22  
23  
24  
25  
26  
27  
28 ***Risk factors (dependent variables)***

29  
30 According to sex, the highest injury prevalence occurs at different chronological ages.  
31 From 23 to 24 years old in males, from 17 to 18 years old in females. There are many  
32 related studies that found a significance correlation between chronological age and  
33 injury incidence [16, 22, 24, 35-37]. The data of this study confirm the same results,  
34 indicating the chronological age as a potential risk factor for injury incidence in elite  
35 taekwondo athletes.

36  
37  
38  
39  
40  
41  
42  
43  
44 Sex differences according to the weight category is a clear indicator that men  
45 suffer more injuries in all weight categories with the exception of intermediate category.  
46 This exception is explained by the fact that there are fewer cases of male taekwondo  
47 athletes represented. Moreover, independently of sex or Olympic period, the weight  
48 category emerges as a possible injury risk factor.

49  
50  
51  
52  
53  
54  
55  
56 Finally, the injury risk factors related to the variables of annual quarters, and  
57 especially, injury timing, varies according to sex. Indeed, only in the case of female  
58  
59  
60

1  
2  
3 taekwondists, the injury timing emerges as an important risk factor to consider in  
4  
5 training and competition strategies. These results are relevant because the SNT trains  
6  
7 in CAR (men and women) under the same workload and intensity, they share  
8  
9 equipment, training systems and prevention methods. This should to minimize the  
10  
11 differences between sexes, but this not always happen, as occurs in the case of injury  
12  
13 timing.  
14

## 15 16 17 **CONCLUSIONS**

18  
19 The anatomical sites with more injury incidence correspond to the knee, foot, thigh,  
20  
21 ankle, and lower leg. In SNT prevailing contusions, joint and cartilage injuries.  
22  
23 Chronological age and weight category always show a statistically significant relation  
24  
25 as possible injury risk factors. Annual quarter and injury timing show different possible  
26  
27 dependent behaviors according to sex or different OP. The present study has some  
28  
29 limitations to be considered: not correspond to a prospective and/or longitudinal study  
30  
31 design; despite the high number of IE, there is a low number of taekwondists included.  
32  
33 This study provide epidemiological information that will help to inform future injury  
34  
35 surveillance studies. Further research is needed to achieve a better understanding of elite  
36  
37 taekwondo, in relation to sex and competitive categories.  
38  
39  
40  
41  
42

43 What are the new findings?

- 44 - OSICS classification appears to be sensitive to classifying the injury location
- 45 and type, and to discriminate potential injury risk factors.
- 46
- 47 - Lower limb injuries including knee, foot, thigh, ankle and lower leg, are more
- 48 common than upper limb injuries.
- 49
- 50 - Contusions, joint and cartilage injuries and, in smaller proportion, tendon and
- 51 muscle injuries, are the prevailing anatomical types of injury.
- 52
- 53 - Chronological age and the weight categories can be considered as risk factors
- 54 to sustain injuries in elite taekwondo according to their location and type.
- 55
- 56 - There are some injury risk factors associated with female elite taekwondists
- 57 and not with their male counterparts (injury timing).
- 58
- 59
- 60

How might it impact on clinical practice in the near future?

- Clinicians taking care of athletes are now aware of different patterns of injuries in Taekwondo practitioners.
- It can start the development of prevention strategies and recommendations to reduce the number of injuries in taekwondo.
- Training all the subjects together regardless the sex can be a factor to be implemented in other sports to assess whether the differences between them are reduced, or not.

## ACKNOWLEDGMENTS

The authors would like to express their gratitude to the athletes who participated in the study, as well as to the technical staff and medical department of the National Taekwondo Federation.

## FOOTNOTES

**Contributorship statement:** All the authors contributed in a substantial manner to the planning and conduction of the testing, literature review and/or manuscript preparation. Conceived and designed: AAB, FD, AI. Analysed the data: AAB, JBM, AI. Contributed reagents/materials/analysis tools: AAB, LT, JBM, AI. Wrote the paper: AAB, FD, NM, AI. They all gave final approval of the version submitted.

**Funding:** The study was supported by grants from the Agency for Management of University and Research Grants (AGAUR) the Catalan National Institute of Physical Education (Institut Nacional d'Educació Física de Catalunya) and the High Performance Centre (Centre Alt Rendiment Esportiu), Generalitat de Catalunya; resolution : VCP/3346/2009.

**Competing interests:** None.

**Ethics approval:** The study protocol was approved by the Ethics Sports Clinical Investigations Committee.

**Data sharing statement:** Extra data is available by emailing AAB.

**REFERENCES**

- 1-World-Taekwondo-Federation. [http://www.wtf.org/wtf\\_eng/main/main\\_eng.html](http://www.wtf.org/wtf_eng/main/main_eng.html).  
Accessed [29/04/13].
- 2-Heller J, Peric T, Dlouha R, et al. Physiological profiles of male and female taekwondo (ITF) black belts. *J Sports Sci* 1998;**16**:243-49.
- 3-Gao B. Research on the somatotype features of chine elite male taekwondo athletes. *Sport Science* 2001;**21**:58-61.
- 4-Melhim A. Aerobic and anaerobic power responses to the practice of taekwondo. *Br J Sports Med* 2001;**35**:231-35.
- 5-Ball N, Nolan E, Wheeler K. Anthropometrical, physiological, and tracked power profiles of elite taekwondo athletes 9 weeks before the olympic competition phase. *Journal of Strength and Conditioning Research / National Strength & Conditioning Association* 2011;**25**(10):2752-63.
- 6-Estevan I, Alvarez O, Falco, C, Molina-Garcia J, et al. Impact force and time analysis influenced by execution distance in a roundhouse kick to the head in taekwondo. *Journal of Strength and Conditioning Research / National Strength & Conditioning Association* 2011;**25**(10):2851-56.
- 7-Grosser M, Brüggemann P, Zintl F. *Alto rendimiento: planificación y desarrollo*. Madrid: Martínez Roca, 1989.
- 8-González de Prado C. *Caracterización técnico-táctica de la competición de combate de alto nivel en taekwondo. efectividad de las acciones tácticas* [dissertation]. Barcelona, Universitat de Barcelona, 2011.

- 1  
2  
3 9-Bridge CA, Jones MA, Drust B. The activity profile in international taekwondo  
4  
5 competition is modulated by weight category. *International Journal of Sports*  
6  
7 *Physiology and Performance* 2011;**6**(3):344-57.  
8  
9  
10  
11 10-Cular D, Krstulovic S, Tomljanovic M. The differences between medalists and non  
12  
13 medalists at the 2008 olympic games taekwondo tournament. *Human Movement*  
14  
15 2011;**12**(2):165-70.  
16  
17  
18  
19 11-Hardy L, Jones G, Gould D, eds. *Understanding psychological preparation for*  
20  
21 *sport*. New York: John Wiley and Sons, 1996.  
22  
23  
24 12-Falcó C, Alvarez O, Castillo I, et al. Influence of the distance in a roundhouse kick's  
25  
26 execution time and impact force in taekwondo. *J Biomech* 2009;**42**(3):242-48.  
27  
28  
29  
30 13-González de Prado C, Iglesias X, Mirallas J, et al. Sistematización de la acción  
31  
32 táctica en el taekwondo de alta competición. *Apunts. Educación Física y Deportes*  
33  
34 2011;**103**:56-67.  
35  
36  
37  
38 14-Junge A, Engebretsen L, Alonso JM, et al. Injury surveillance in multi-sport events:  
39  
40 The international olympic committee approach. *Br J Sports Med* 2008;**42**(6):413-  
41  
42 21.  
43  
44  
45 15-Feehan M, Waller AE. Precompetition injury and subsequent tournament  
46  
47 performance in full-contact taekwondo. *Br J Sports Med* 1995;**29**(4):258-62.  
48  
49  
50  
51 16-Beis K, Tsaklis P, Pieter W, et al. Taekwondo competition injuries in greek young  
52  
53 and adult athletes. *European Journal Sports Traumatology and Related Research*  
54  
55 2001;**23**:130-36.  
56  
57  
58  
59  
60

- 1  
2  
3 17-Lystad RP, Pollard H, Graham PL. Epidemiology of injuries in competition  
4  
5 taekwondo: A meta-analysis of observational studies. *Journal of Science and*  
6  
7 *Medicine in Sport / Sports Medicine Australia* 2009;**12**(6):614-21.  
8  
9  
10  
11 18-Schluter-Brust K, Leistenschneider P, Dargel J, et al. Acute injuries in taekwondo.  
12  
13 *Int J Sports Med* 2011;**32**(8):629-34.  
14  
15  
16 19-Kazemi M. Relationships between injury and success in elite taekwondo athletes. *J*  
17  
18 *Sports Sci* 2012;**30**(3):277-83.  
19  
20  
21 20-Pieter W, Fife GP, O'Sullivan DM. Competition injuries in taekwondo: A literature  
22  
23 review and suggestions for prevention and surveillance. *Br J Sports Med*  
24  
25 2012;**46**(7):485-91.  
26  
27  
28  
29 21-Engebretsen L, Soligard T, Steffen K, et al. Sports injuries and illnesses during the  
30  
31 London Summer Olympic Games 2012. *Br J Sports Med* 2013;**47**:407-14.  
32  
33  
34  
35 22-Pieter W, Zemper ED. Head and neck injuries in young taekwondo athletes. *The J*  
36  
37 *Sports Med Phys Fitness* 1999b;**39**(2):147-53.  
38  
39  
40  
41 23-Zetou E. Injuries in taekwondo athletes. *Physical Training*.  
42  
43 [http://ejmas.com/pt/2006pt/ptart\\_Zetou\\_0906.html](http://ejmas.com/pt/2006pt/ptart_Zetou_0906.html) (accessed 30 May 2013).  
44  
45  
46 24-Kazemi M., Shearer H, Choung YS. Pre-competition habits and injuries in  
47  
48 taekwondo athletes. *BMC Musculoskeletal Disorders* 2005;**6**:26.  
49  
50  
51  
52 25-Pieter W. Taekwondo. In: Kordi R, Mafulli N, Wroble RR, Wallace WA, eds.  
53  
54 *Combat sports medicine*. London: Springer, 2009:263-86.  
55  
56  
57  
58  
59  
60

- 1  
2  
3 26-Til L, Orchard J, Rae K. El sistema de classificació i codificació OSICS-10 traduït  
4  
5 de l'anglès. *Apunts Medicina De L'Esport* 2008;**43**(159), 109.  
6  
7  
8  
9 27- Directive 95/46/EC of the European Parliament and of the Council of 24 October  
10  
11 1995 on the protection of individuals with regard to the processing of personal data  
12  
13 and on the free movement of such data, OJ L 281, 23.11.1995, p.31.  
14  
15  
16 28-Hagglund M, Walden M, Bahr R, et al. Methods for epidemiological study of  
17  
18 injuries to professional football players: Developing the UEFA model. *Br J Sports*  
19  
20 *Med* 2005;**39**(6):340-46.  
21  
22  
23  
24 29-Birrer RB. Trauma epidemiology in the martial arts. the results of an eighteen-year  
25  
26 international survey. *Am J Sports Med* 1996;**24**(6 Suppl):S72-9.  
27  
28  
29  
30 30-Kazemi M, Pieter W. Injuries at the canadian national tae kwon do championships:  
31  
32 A prospective study. *BMC Musculoskeletal Disorders* 2004;**5**:22.  
33  
34  
35 31-Pieter W, Van Ryssegem G, Lufting R, et al. Injury situation and injury mechanism  
36  
37 at the 1993 european taekwondo cup. *Journal of Human Movement Studies*  
38  
39 1995;**28**(I):1-24.  
40  
41  
42  
43 32-Pieter W, Bercades LT, Heijmans J. Injuries in young and adult taekwondo athletes.  
44  
45 *Kines* 1998;**30**(I):22-30.  
46  
47  
48  
49 33-Pieter W, Zemper ED. Injuries in adult american taekwondo athletes. *Fifth IOC*  
50  
51 *World Congress on Sports Sciences*; 31 October-15 November 1999, Sydney.  
52  
53 Australia. 1999a.  
54  
55  
56 34-Zemper ED, Pieter W. Injury rates during the 1988 US olympic team trials for  
57  
58 taekwondo. *Br J Sports Med* 1989;**23**(3):161-64.  
59  
60



- 1  
2  
3 35-Zetaruk MN, Violan MA, Zurakowski D, et al. Injuries in martial arts: A comparison  
4  
5 of five styles. *Br J Sports Med* 2005;**39**(1):29-33.  
6  
7  
8  
9 36-Kazemi M, Chudolinski A, Turgeon M, et al. Nine year longitudinal retrospective  
10  
11 study of taekwondo injuries. *The Journal of the Canadian Chiropractic Association*  
12  
13 2009;**53**(4):272-81.  
14  
15  
16 37-Siana J, Borum P, Kryger H. Injuries in taekwondo. *Br J Sports Med*  
17  
18 1986;**20**(4):165-66.  
19  
20  
21 38-Cunningham C, Cunningham S. Injury surveillance at a national multi-sport event.  
22  
23 *Aust J Sci Med Sport* 1996;**28**(2):50-56.  
24  
25  
26  
27 39-Kim EH, Kim YS, Toun SW, et al. Survey and analysis of sports injuries and  
28  
29 treatment patterns among korean national athletes. *Korean Journal Sports Science*  
30  
31 1994;**6**(1):33-56.  
32  
33  
34  
35 40-Myklebust G, Maehlum S, Holm I, et al. A prospective cohort study of anterior  
36  
37 cruciate ligament injuries in elite norwegian team handball. *Scand J Med Sci Sports*  
38  
39 1998;**8**(3):149-53.  
40  
41  
42  
43 41-Myklebust G, Engebretsen L, Braekken IH, et al. Prevention of anterior cruciate  
44  
45 ligament injuries in female team handball players: A prospective intervention study  
46  
47 over three seasons. *Clinical Journal of Sport Medicine : Official Journal of the*  
48  
49 *Canadian Academy of Sport Medicine* 2003;**13**(2):71-78.  
50  
51  
52  
53 42-Soderman K., Alfredson H, Pietila T, et al. Risk factors for leg injuries in female  
54  
55 soccer players: A prospective investigation during one out-door season. *Knee Surg*  
56  
57 *Sports Traumatol Arthrosc* 2001;**9**(5):313-21.  
58  
59  
60

1  
2  
3  
4  
5  
6  
7  
8  
9  
10  
11  
12  
13  
14  
15  
16  
17  
18  
19  
20  
21  
22  
23  
24  
25  
26  
27  
28  
29  
30  
31  
32  
33  
34  
35  
36  
37  
38  
39  
40  
41  
42  
43  
44  
45  
46  
47  
48  
49  
50  
51  
52  
53  
54  
55  
56  
57  
58  
59  
60

43-Kazemi M, Waalen J, Morgan C, et al. A profile of olympic taekwondo competitors.

*Journal of Sports Science and Medicine (CSSI)* 2006;114-21.

44-Kazemi M, Perri G, Soave D. A profile of 2008 olympic taekwondo competitors.

*The Journal of the Canadian Chiropractic Association* 2010;54(4):243-49.

For peer review only

STROBE 2007 (v4) Statement—Checklist of items that should be included in reports of *cross-sectional studies*

| Section/Topic                | Item # | Recommendation                                                                                                                                                                       | Reported on page # |
|------------------------------|--------|--------------------------------------------------------------------------------------------------------------------------------------------------------------------------------------|--------------------|
| Title and abstract           | 1      | (a) Indicate the study's design with a commonly used term in the title or the abstract                                                                                               | 1                  |
|                              |        | (b) Provide in the abstract an informative and balanced summary of what was done and what was found                                                                                  | 2                  |
| <b>Introduction</b>          |        |                                                                                                                                                                                      |                    |
| Background/rationale         | 2      | Explain the scientific background and rationale for the investigation being reported                                                                                                 | 3, 4               |
| Objectives                   | 3      | State specific objectives, including any prespecified hypotheses                                                                                                                     | 3, 4               |
| <b>Methods</b>               |        |                                                                                                                                                                                      |                    |
| Study design                 | 4      | Present key elements of study design early in the paper                                                                                                                              | 4                  |
| Setting                      | 5      | Describe the setting, locations, and relevant dates, including periods of recruitment, exposure, follow-up, and data collection                                                      | 5, 6               |
| Participants                 | 6      | (a) Give the eligibility criteria, and the sources and methods of selection of participants                                                                                          | 5, 6               |
| Variables                    | 7      | Clearly define all outcomes, exposures, predictors, potential confounders, and effect modifiers. Give diagnostic criteria, if applicable                                             | 5, 6               |
| Data sources/<br>measurement | 8*     | For each variable of interest, give sources of data and details of methods of assessment (measurement). Describe comparability of assessment methods if there is more than one group | 5, 6               |
| Bias                         | 9      | Describe any efforts to address potential sources of bias                                                                                                                            | 5, 6               |
| Study size                   | 10     | Explain how the study size was arrived at                                                                                                                                            | 5, 6               |
| Quantitative variables       | 11     | Explain how quantitative variables were handled in the analyses. If applicable, describe which groupings were chosen and why                                                         | 5, 6               |
| Statistical methods          | 12     | (a) Describe all statistical methods, including those used to control for confounding                                                                                                | 7                  |
|                              |        | (b) Describe any methods used to examine subgroups and interactions                                                                                                                  | 7                  |
|                              |        | (c) Explain how missing data were addressed                                                                                                                                          | 7                  |
|                              |        | (d) If applicable, describe analytical methods taking account of sampling strategy                                                                                                   | 7                  |
|                              |        | (e) Describe any sensitivity analyses                                                                                                                                                | 7                  |
| <b>Results</b>               |        |                                                                                                                                                                                      |                    |

|                          |     |                                                                                                                                                                                                              |       |
|--------------------------|-----|--------------------------------------------------------------------------------------------------------------------------------------------------------------------------------------------------------------|-------|
| Participants             | 13* | (a) Report numbers of individuals at each stage of study—eg numbers potentially eligible, examined for eligibility, confirmed eligible, included in the study, completing follow-up, and analysed            | 8     |
|                          |     | (b) Give reasons for non-participation at each stage                                                                                                                                                         | 8     |
|                          |     | (c) Consider use of a flow diagram                                                                                                                                                                           | 8     |
| Descriptive data         | 14* | (a) Give characteristics of study participants (eg demographic, clinical, social) and information on exposures and potential confounders                                                                     | 8     |
|                          |     | (b) Indicate number of participants with missing data for each variable of interest                                                                                                                          | 8     |
| Outcome data             | 15* | Report numbers of outcome events or summary measures                                                                                                                                                         | 8     |
| Main results             | 16  | (a) Give unadjusted estimates and, if applicable, confounder-adjusted estimates and their precision (eg, 95% confidence interval). Make clear which confounders were adjusted for and why they were included | 9-15  |
|                          |     | (b) Report category boundaries when continuous variables were categorized                                                                                                                                    | 9-15  |
|                          |     | (c) If relevant, consider translating estimates of relative risk into absolute risk for a meaningful time period                                                                                             | 9-15  |
| Other analyses           | 17  | Report other analyses done—eg analyses of subgroups and interactions, and sensitivity analyses                                                                                                               | 9-15  |
| <b>Discussion</b>        |     |                                                                                                                                                                                                              |       |
| Key results              | 18  | Summarise key results with reference to study objectives                                                                                                                                                     | 16-18 |
| Limitations              | 19  | Discuss limitations of the study, taking into account sources of potential bias or imprecision. Discuss both direction and magnitude of any potential bias                                                   | 16-18 |
| Interpretation           | 20  | Give a cautious overall interpretation of results considering objectives, limitations, multiplicity of analyses, results from similar studies, and other relevant evidence                                   | 16-18 |
| Generalisability         | 21  | Discuss the generalisability (external validity) of the study results                                                                                                                                        | 19    |
| <b>Other information</b> |     |                                                                                                                                                                                                              |       |
| Funding                  | 22  | Give the source of funding and the role of the funders for the present study and, if applicable, for the original study on which the present article is based                                                |       |

\*Give information separately for cases and controls in case-control studies and, if applicable, for exposed and unexposed groups in cohort and cross-sectional studies.

**Note:** An Explanation and Elaboration article discusses each checklist item and gives methodological background and published examples of transparent reporting. The STROBE checklist is best used in conjunction with this article (freely available on the Web sites of PLoS Medicine at <http://www.plosmedicine.org/>, Annals of Internal Medicine at <http://www.annals.org/>, and Epidemiology at <http://www.epidem.com/>). Information on the STROBE Initiative is available at [www.strobe-statement.org](http://www.strobe-statement.org).



**Epidemiology of injuries in elite taekwondo athletes: two Olympic periods cross-sectional retrospective study**

|                                 |                                                                                                                                                                                                                                                                                                                                                                                                                                                                                                                                                                                                                                                                                                                                                                                                                           |
|---------------------------------|---------------------------------------------------------------------------------------------------------------------------------------------------------------------------------------------------------------------------------------------------------------------------------------------------------------------------------------------------------------------------------------------------------------------------------------------------------------------------------------------------------------------------------------------------------------------------------------------------------------------------------------------------------------------------------------------------------------------------------------------------------------------------------------------------------------------------|
| Journal:                        | <i>BMJ Open</i>                                                                                                                                                                                                                                                                                                                                                                                                                                                                                                                                                                                                                                                                                                                                                                                                           |
| Manuscript ID:                  | bmjopen-2013-004605.R1                                                                                                                                                                                                                                                                                                                                                                                                                                                                                                                                                                                                                                                                                                                                                                                                    |
| Article Type:                   | Research                                                                                                                                                                                                                                                                                                                                                                                                                                                                                                                                                                                                                                                                                                                                                                                                                  |
| Date Submitted by the Author:   | 13-Jan-2014                                                                                                                                                                                                                                                                                                                                                                                                                                                                                                                                                                                                                                                                                                                                                                                                               |
| Complete List of Authors:       | Altarriba-Bartes, Albert; New York Red Bulls, Performance Department; Care and Preventive Sport Unit (UAPE-CAR), Health Consortium of Terrassa - High Performance Sports Center<br>Drobnic, Franchek; FC Barcelona, Medical Services Department; High Performance Sports Center of Sant Cugat del Vallés (CAR), Research Department<br>Til Pérez, Luís; Care and Preventive Sport Unit (UAPE-CAR), Health Consortium of Terrassa - High Performance Sports Center; FC Barcelona, Medical Department<br>Malliaropoulos, Nikolaos; National Track and Field Centre, Sports Medicine Clinic SEGAS<br>Montoro, Bruno; University Hospital of Vall d'Hebron, Pharmacology Department<br>Irurtia Amigó, Alfredo; National Institute of Physical Education of Catalonia, (University of Barcelona) Sports Performance Department |
| <b>Primary Subject Heading</b>: | Sports and exercise medicine                                                                                                                                                                                                                                                                                                                                                                                                                                                                                                                                                                                                                                                                                                                                                                                              |
| Secondary Subject Heading:      | Epidemiology                                                                                                                                                                                                                                                                                                                                                                                                                                                                                                                                                                                                                                                                                                                                                                                                              |
| Keywords:                       | Epidemiology < TROPICAL MEDICINE, SPORTS MEDICINE, REHABILITATION MEDICINE                                                                                                                                                                                                                                                                                                                                                                                                                                                                                                                                                                                                                                                                                                                                                |
|                                 |                                                                                                                                                                                                                                                                                                                                                                                                                                                                                                                                                                                                                                                                                                                                                                                                                           |

SCHOLARONE™  
Manuscripts

1  
2  
3 **Epidemiology of injuries in elite taekwondo athletes: two Olympic**  
4 **periods cross-sectional retrospective study**  
5  
6  
7

8  
9 **Albert Altarriba-Bartes** <sup>1,2</sup>

10 C/ Costabona 74, 17500 Ripoll (Girona) SPAIN

11 [albertaltarriba@hotmail.com](mailto:albertaltarriba@hotmail.com) or [altarribartes@gmail.com](mailto:altarribartes@gmail.com)

12 +34666911893 or +19733687224  
13  
14  
15  
16  
17  
18  
19

20 **Franchek Drobnic MD, PhD** <sup>3,4</sup>, **Lluís Til MD** <sup>2,4</sup>, **Nikolaos Malliaropoulos MD,**  
21 **MSc, PhD** <sup>5,6</sup>, **José Bruno Montoro PhD** <sup>7</sup>, **Alfredo Irurtia PhD** <sup>8</sup>  
22  
23  
24

25 <sup>1</sup> New York Red Bulls Performance Department, New York, United States of America.

26  
27 <sup>2</sup> Care and Preventive Sport Unit (UAPE-CAR). Health Consortium of Terrassa - High  
28 Performance Sports Center of Sant Cugat del Vallés, Spain.  
29

30  
31 <sup>3</sup> Research Department of High Performance Sports Center, Sant Cugat del Vallés,  
32 Spain.  
33  
34

35  
36 <sup>4</sup> Medical Services of FC Barcelona, Barcelona, Spain.  
37

38  
39 <sup>5</sup> National Track & Field Center, Sports Injury Clinic, Sports Medicine Clinic of  
40 S.E.G.A.S., Thessaloniki, Greece.  
41

42  
43 <sup>6</sup> Thessaloniki Sports Medicine Clinic, Greece.  
44

45  
46 <sup>7</sup> University Hospital of Vall d'Hebron, Pharmacology Department, Barcelona, Spain.  
47

48  
49 <sup>8</sup> National Institute of Physical Education of Catalonia, University of Barcelona, Sports  
50 Performance Department, Barcelona, Spain.  
51

52 Olympics, Martial Arts, Taekwondo, Sporting injuries, Epidemiology, Injury Prevention  
53  
54  
55

56 *Word count – 2940 words*  
57  
58  
59  
60

## ABSTRACT

**Background:** Taekwondo is a popular Korean martial art characterised by its emphasis on dynamic kicking techniques. Taekwondo has been included in the Olympic Games program since 2000 Sydney Olympic Games. Although it is becoming an increasingly popular sport, there is a lack of reliable epidemiologic data on Taekwondo injuries.

**Aim:** This analytical cross-sectional retrospective cohort study aims to describe reported Taekwondo injuries and to determine the prevalence, characteristics and possible injury risk factors sustained by the Spanish National Team athletes. Additionally, we compared each identified risk factor, such as: age, weight category, annual quarter, injury timing and competition difficulty level, with its relation to injury location and type.

**Methods:** This study was a summation of two Olympic periods, eight years, of data of injury reports, which included 1678 injury episodes. The data were collected on standardized injury reports at time of the first medical visit. The data analysis was performed at the High Performance Sports Center in Sant Cugat del Vallés (Barcelona, Spain).

**Results:** Independently of sex or Olympic period, the anatomical sites with more injury episodes, are: knee (21.3%), foot (17.0%), ankle (12.2%), thigh (11.4%), and lower leg (8.8%). Contusions (29.3%), cartilage (17.6%), and joint (15.7%) injuries, are the prevailing types of injury. Chronological age, weight categories and the annual quarter can be considered as risk factors to sustain injuries in male and female elite taekwondist according to their location and type ( $p \leq 0.001$ ).

**Conclusions:** The present study provides epidemiological information that will help to inform future injury surveillance studies and the development of prevention strategies and recommendations to reduce the number of injuries in taekwondo competition.

**STRENGTHS AND LIMITATIONS**

- A large analytical cross-sectional study over a 8-year period and the new findings of different associations between risk factors to sustain an injury and its location and type in elite taekwondo athletes were among the main strengths.
- Retrospective nature and unavailability of some relevant data.

For peer review only



## INTRODUCTION

Taekwondo is a systematic and scientific Korean age-old martial art that involves multiple physical fighting skills. This fully recognized Olympic sport is regulated by the World Taekwondo Federation and is considered one of the most worldwide popular sports, with a range of 75 to 120 million practitioners in more than 140 countries. Spain is in the top of current medals ranking in the last London 2012 Olympic Games and represent one of the most traditional countries in terms of international sporting success.

[1]

Taekwondo competitive performance depends on several factors, including physical, [2-6] psychological, [7, 8] technical, [9, 10] and tactical. [11-13] Their practitioners compete according to sex and defined weight categories classification in a full-contact event of two opponents divided in three semi-continuous rounds of two minutes, with one minute's rest between rounds. Taekwondists are equipped with a padded trunk protector, protective padded headgear, protective gloves, and shin guards. Victory is achieved by higher scores given by judges for the specific fighting techniques allowed (kicks and punches), accurately and powerfully, in the legal scoring areas (the abdomen and both sides of the flank; the permitted parts of the face).

Understanding the injury pattern of a particular sport and its inherent risk factors, is a key area of current sports medicine. [14] As within many other combat sports, there is a high potential for injury associated with elite athletic performance in taekwondo. [15-21] Defining injury as any circumstance for which the athlete sought the assistance of the on-site medical personnel, the latest reviews about competition injuries in taekwondo concluded that total injury rates for elite men ranged from 20.6 to 139.5 per 1000 athlete-exposure (A-E), and for elite women between 25.3 to 105.5 per

1  
2  
3 1000 A–E. When only time-loss injuries are contemplated, rates for men varied from  
4  
5 6.9 to 33.6 per 1000 A–E and for women from 2.4 to 23.0 per 1000 A–E. [20]  
6  
7

8 The main injury mechanism in taekwondo is the direct contact, especially  
9  
10 through the exchange of accurate turning kicks and poorly performed or non existent  
11  
12 blocking skills. [17, 20, 22, 23] The vast majority of all injuries are localized to the  
13  
14 lower extremities, especially in the instep of the foot, and these are contusions, sprains  
15  
16 and muscle strains. [17, 20, 24, 25] The head and the neck regions are the next  
17  
18 anatomical locations with an increased prevalence in taekwondo competition injuries.  
19  
20  
21 [17, 20]  
22  
23

24  
25 Despite the well-documented epidemiology injury profile in taekwondo  
26  
27 competition, relatively few studies have evaluated the incidence of injury risk factors  
28  
29 related to the training process and long-term preparation in elite level. The main  
30  
31 objective of this eight years cross-sectional retrospective cohort study was to determine  
32  
33 the prevalence, characteristics (anatomical location and injury type), and possible injury  
34  
35 risk factors sustained by male and female Spanish National Team (SNT) taekwondists  
36  
37 trained in the High Performance Sports Center (CAR) in Sant Cugat del Vallés  
38  
39 (Barcelona, Spain) throughout two different Olympic periods (Sydney 1997 – 2000 and  
40  
41 Athens 2001 – 2004).  
42  
43  
44

## 45 46 **METHODS**

### 47 48 **Type of study**

49  
50 This study is a large analytical cross-sectional retrospective cohort study over eight  
51  
52 years, divided into two different four years Olympic periods (OP).  
53  
54  
55  
56  
57  
58  
59  
60

### Study participants

From the 1<sup>st</sup> of January 1997 through the 31<sup>st</sup> of December 2004, a total of 48 taekwondo athletes from the SNT were studied. There were 22 male and 26 female athletes (45.8% and 54.2% of all athletes, respectively). The mean (+SD) age of the athletes in this study was 21.6±1.2 years (minimum=15 years, maximum=31 years). The inclusion criteria was: 1) to have trained for the national taekwondo group for a minimum of one sports season, and 2) being a member of the SNT.

### Data collection and injury report form

Two data sources were utilized. The first source was a comprehensive database obtained from the CAR, to provide personal and general information about each athlete. The second data source was from an electronic medical data capture system from the CAR sports medical department. This contained the following data fields in an unidentified format: athlete accreditation number, sex, age, date of first registration at CAR, weights category, medical visit date (day/month/year), and injury diagnosis. All injuries were diagnosed by sports medicine doctors, and subsequently recorded by anatomical location (OSICS-1) and injury type (OSICS-2) according to Orchard Sports Injury Classification System, V.10 (OSICS-10). [26] The system of data entry and storage complied with existing European Union standards for medical data storage. [27]

### Procedures

The total number of injury episodes (n=1678; males: n=912; females: n=766) were obtained and analysed individually for every elite taekwondist classified by sex and OP. Definition of injury episodes (IE) corresponds to the series of medical visits sustained by an athlete, related to the same injury (same OSICS coding) and occurred no more than two months apart from each other. If the time between them is greater than two months, this is classified as a new episode. We determined this length of time according

1  
2  
3 to the definition of reinjury proposed by Hagglund: [28] “an injury of the same type and  
4 location of a previous injury that occurred within two months of the final rehabilitation  
5 day of the previous injury”. Additionally, has been included a severity index of injuries,  
6 based on the number of medical visits (MV) generated by an IE (more MV, more injury  
7 severity). Results related to MV are shown as online supplement data.  
8  
9

10  
11  
12  
13  
14 Analysed variables used were: chronological age (expressed in years, and three  
15 age groups: from 15 to 20 years old, 21 to 25 years old, and 26 to 31 years old); weight  
16 category (very light, light, medium, and heavy); annual quarter when injury occurs;  
17 injury timing (pre-competition: fifteen days before the beginning of the competition;  
18 competition and/or post-competition: all the injuries sustained in competition and/or  
19 within the next fifteen days after the last day of competition; out of competition or  
20 during training sessions); competition difficulty level (World Championships –WC–,  
21 World Cups –WCU–, European Championships –EUC–, National Championships –  
22 WC–), which includes as pre-competition injuries all the injuries registered during the  
23 fifteen days before the first day of competition and as post-competition injuries all the  
24 injuries registered during the days of competition and/or within the next fifteen days  
25 after the last day of competition.  
26  
27  
28  
29  
30  
31  
32  
33  
34  
35  
36  
37  
38  
39  
40  
41

### 42 **Definition of injury**

43  
44 This study adhered to the operational injury definitions recommended by Junge *et al.*,  
45 [14] thus an injury was defined as new or recurring musculoskeletal complaints or  
46 concussions incurred during competition or training receiving medical attention,  
47 regardless of time loss from competition or training.  
48  
49  
50  
51  
52

### 53 **Confidentiality and ethical approval**

54  
55 Research ethics approval was obtained from the Ethics Sports Clinical Investigations  
56 Committee of Catalonia (ID-0099S/10308/2011). The investigators obtained the  
57  
58  
59  
60

1  
2  
3 informed consent from the subjects to access and collect past medical history data and  
4  
5 voluntarily participated in the study. All data were stored on highly secured, password-  
6  
7 protected files. The investigators signed a confidentiality agreement that states all data  
8  
9 gathered during the duration of the study will be utilized solely for the purpose of the  
10  
11 investigation.  
12

### 13 14 15 **Statistical analysis**

16  
17 Data are expressed as the number of IE and presented by the standard basic descriptive  
18  
19 statistics of mean and standard deviation. The injury classification (OSICS-1:  
20  
21 anatomical location; OSICS-2: injury type) and the independent variables  
22  
23 (chronological age, weight category, annual quarter, injury timing, competition  
24  
25 difficulty level) were analysed in relation to sex and OP. In order to compare the  
26  
27 differences between both OP or between sexes, a Student's t-test or analogue non-  
28  
29 parametric Mann-Whitney U test were performed, depending on whether the data were  
30  
31 normally distributed or not, respectively. In order to analyze the probability of  
32  
33 considering a risk factor, or a possible behavior-dependent generator between the  
34  
35 injuries (by the criterion of OSICS classification) and each of the independent variables,  
36  
37 we used the Pearson Chi-squared test, and adjusted odds ratio (OR). We regarded two-  
38  
39 tailed p Bonferroni adjusted values  $\leq 0.001$  as significant. All statistical modeling was  
40  
41 performed using SPSS<sup>®</sup> 19.0 (SPSS Inc. Chicago, USA).  
42  
43  
44  
45  
46  
47

## 48 **RESULTS**

### 49 50 **OSICS-1 classification (anatomical sites)**

51  
52 Independently of sex or OP, the anatomical sites with more IE, are (Figure 1): knee,  
53  
54 foot, ankle, thigh, and lower leg.  
55  
56  
57  
58  
59  
60

### OSICS-2 classification (injury type)

Independently of sex or OP, the type of injury with more IE, are (Figure 2): bruising/hematomas (contusions); joint dislocations and joint sprains; arthritis, cartilage injuries, synovitis, impingements, bursitis and chronic instability; muscle injuries; tendon injuries.

### Chronological age

IE significant differences were found between sexes during the first OP, in the chronological age groups of 21 to 25 years old (males:  $48.8 \pm 11.9$  vs females:  $26.6 \pm 6.7$ ;  $p=0.03$ ). Independently of the different OP, chronological ages recorded a greater number of IE, are (Table 1): 23-24 years old for males (IE: 20.5%;  $n=187$ ) and 17-18 years old for females (IE: 22.7% ;  $n=174$ ). With the numbers available (Table 3), exclusively during the second OP, seems to exist a sufficiently high injury prevalence in anatomical locations (OSICS-1) or injury types (OSICS-2), as for consider a behavior susceptible to be dependent (males:  $OR=2.62$  / females:  $OR=3.07$ ).

Table 1. Injury episodes according to chronological age groups, related to sex and two Olympic periods.

| Chronological age | Males           |      |                 |      | Females         |      |                 |      |
|-------------------|-----------------|------|-----------------|------|-----------------|------|-----------------|------|
|                   | 1 <sup>st</sup> |      | 2 <sup>nd</sup> |      | 1 <sup>st</sup> |      | 2 <sup>nd</sup> |      |
|                   | (n)             | (%)  | (n)             | (%)  | (n)             | (%)  | (n)             | (%)  |
| 15                | 3               | 0,8  | 0               | 0,0  | 11              | 3,5  | 4               | 0,9  |
| 16                | 23              | 5,3  | 2               | 0,4  | 38              | 12,2 | 22              | 4,8  |
| 17                | 25              | 5,8  | 22              | 4,6  | 58              | 18,6 | 30              | 6,6  |
| 18                | 23              | 5,3  | 38              | 7,9  | 30              | 9,6  | 56              | 12,3 |
| 19                | 31              | 7,2  | 53              | 11,0 | 17              | 5,5  | 44              | 9,7  |
| 20                | 43              | 10,0 | 49              | 10,2 | 4               | 1,3  | 62              | 13,6 |
| 21                | 57              | 13,2 | 37              | 7,6  | 18              | 5,8  | 53              | 11,6 |
| 22                | 42              | 9,7  | 24              | 5,0  | 26              | 8,4  | 42              | 9,3  |
| 23                | 65              | 15,1 | 41              | 8,5  | 35              | 11,3 | 43              | 9,5  |
| 24                | 44              | 10,2 | 37              | 7,7  | 31              | 10,0 | 28              | 6,2  |
| 25                | 36              | 8,4  | 50              | 10,4 | 23              | 7,4  | 13              | 2,9  |
| 26                | 14              | 3,2  | 59              | 12,3 | 10              | 3,2  | 16              | 3,5  |
| 27                | 17              | 3,9  | 37              | 7,7  | 10              | 3,2  | 22              | 4,8  |
| 28                | 6               | 1,4  | 11              | 2,3  | 0               | 0,0  | 11              | 2,4  |

|    |   |     |    |     |   |     |   |     |
|----|---|-----|----|-----|---|-----|---|-----|
| 29 | 2 | 0,5 | 9  | 1,9 | 0 | 0,0 | 7 | 1,5 |
| 30 | 0 | 0,0 | 12 | 2,5 | 0 | 0,0 | 0 | 0,0 |
| 31 | 0 | 0,0 | 0  | 0,0 | 0 | 0,0 | 2 | 0,4 |

n: number of injury episodes; 1<sup>st</sup> (1997 - 2000); 2<sup>nd</sup> (2001-2004).

### Weight category

Independently of the OP analysed, the male weight category group which has more IE, is the under 58 kg (IE: 35.6%; n=325). Then, from 58 to 68 kg (IE: 30.9%; n=282), from 68 to 80 kg (IE: 17.6%; n=160), and more than 80 kg (IE: 15.9%; n=145). In females, is the light weight category from 49 to 57 kg the one with more IE (IE: 30.9%; n=237). The next distribution per weight groups is: from 57 to 67 kg (IE: 30.2%; n=231), under 49 kg (IE: 29.9%; n=229), and more than 67 kg (IE: 9.0%; n=69). Significant differences (p=0.01), were found between sexes in all weight categories (in the very light and heavy weight categories during the first OP, and in the light and medium weight category during the second OP) and between OP in the same sex: females in very light and heavy weight categories and males in light and medium weight categories. Except in the first OP, OSICS-2 in males (Table 3), seems to exist a sufficiently high injury prevalence in anatomical locations (OSICS-1) or injury types (OSICS-2) to consider the weight category as a injury risk factor (males: OR=2.02 / females: OR=1.50).

### Annual quarter

From the total of 912 IE generated by the males (Table 2), 35.7% (n=326) were sustained for the athletes in the first annual quarter, 26.3% (n=240) in the second annual quarter, 15.3% (n=139) in the third annual quarter, and 22.7% (n=207) in the fourth annual quarter. From the total of 766 IE generated by the females (Table 2), 33.0% (n=253) were sustained for the athletes in the first annual quarter, 31.1% (n=238) in the

second annual quarter, 14.5% (n=111) in the third annual quarter, and 21.4% (n=164) in the fourth annual quarter.

Table 2. Injury episodes according to the months when injury occurred, related to sex and two Olympic periods.

| Months    | Males           |      |                 |      | Females         |      |                 |      |
|-----------|-----------------|------|-----------------|------|-----------------|------|-----------------|------|
|           | 1 <sup>st</sup> |      | 2 <sup>nd</sup> |      | 1 <sup>st</sup> |      | 2 <sup>nd</sup> |      |
|           | (n)             | (%)  | (n)             | (%)  | (n)             | (%)  | (n)             | (%)  |
| January   | 43              | 10,0 | 47              | 9,8  | 47              | 15,1 | 51              | 11,2 |
| February  | 55              | 12,8 | 72              | 15,0 | 26              | 8,4  | 47              | 10,3 |
| March     | 59              | 13,7 | 50              | 10,4 | 35              | 11,3 | 47              | 10,3 |
| April     | 42              | 9,7  | 50              | 10,4 | 40              | 12,9 | 53              | 11,6 |
| May       | 52              | 12,1 | 54              | 11,2 | 48              | 15,4 | 64              | 14,1 |
| June      | 29              | 6,7  | 13              | 2,7  | 13              | 4,2  | 20              | 4,4  |
| July      | 7               | 1,6  | 30              | 6,2  | 4               | 1,3  | 8               | 1,8  |
| August    | 18              | 4,2  | 13              | 2,7  | 24              | 7,7  | 23              | 5,2  |
| September | 31              | 7,2  | 40              | 8,3  | 20              | 6,4  | 32              | 7,0  |
| October   | 39              | 9,0  | 31              | 6,4  | 28              | 9,0  | 36              | 7,9  |
| November  | 42              | 9,7  | 63              | 13,1 | 15              | 4,8  | 48              | 10,5 |
| December  | 14              | 3,3  | 18              | 3,8  | 11              | 3,5  | 26              | 5,7  |

n: number of injury episodes; 1<sup>st</sup> (1997-2000); 2<sup>nd</sup> (2001-2004).

No differences were found between sexes or OP. Excluding the results obtained by male taekwondists during the first OP (Table 3), the annual quarter seems to condition a significant prevalence of injury anatomical site (OSICS-1) and injury type (OSICS-2), and could be considered as a injury risk factor (males: OR=2.04 / females: OR=1.71).

### Injury timing

From the total of 1678 IE, 61.1% were sustained or during training sessions or out of competition (n=1026), 23.3% in pre-competition period (n=391) and 15.6% in competition or post-competition period (n=261). No differences exist between OP according to the number of IE. There is no significant relationship between injury timing and injury anatomical sites (OSICS-1) or injury types (OSICS-2). Therefore,



with the numbers available, injury timing should not be considered as a risk factor or a possible behavior-dependent generator of injuries in elite Taekwondo athletes (Table 3).

### Competition difficulty level

From the total of 367 IE derived from competition in males, 45.2% (n=166) were sustained during NC, 14.4% (n=53) during EUC, 27.2% (n=100) during WC, and 13.1% (n=48) during WCU. From the total of 286 IE derived from competition in females, 38.8% (n=111) were sustained during NC, 17.5% (n=50) during EUC, 25.5% (n=73) during WC, and 18.2% (n=52) during WCU. No differences exist between OP according to the number of IE in relation to the competition difficulty level. There is no significant relationship between competition difficulty level and injury anatomical sites (OSICS-1) or injury types (OSICS-2). These results are independent of whether the injury has occurred pre or post-competition (Table 3). So, with current data, the competition difficulty level should not be considered as a risk factor or a possible behavior-dependent generator of injuries in elite Taekwondo athletes.

Table 3. Statistical dependency levels of independent variables according to sex and two different Olympic periods.

|                   | Sex     | OSICS | Olympic period  | IE (n) | df | X <sup>2</sup> | P <sub>adjusted</sub> |
|-------------------|---------|-------|-----------------|--------|----|----------------|-----------------------|
| Chronological age | Males   | 1     | 1 <sup>st</sup> | 431    | 24 | 43.04          | 0.005                 |
|                   |         | 2     | 1 <sup>st</sup> | 431    | 22 | 40.99          | 0.005                 |
|                   |         | 1     | 2 <sup>nd</sup> | 481    | 24 | 48.71          | 0.001 *               |
|                   |         | 2     | 2 <sup>nd</sup> | 481    | 22 | 49.81          | 0.001 *               |
|                   | Females | 1     | 1 <sup>st</sup> | 311    | 24 | 128.63         | 0.002                 |
|                   |         | 2     | 1 <sup>st</sup> | 311    | 22 | 44.26          | 0.003                 |
| Weight category   | Males   | 1     | 1 <sup>st</sup> | 431    | 36 | 131.56         | 0.001 *               |
|                   |         | 2     | 1 <sup>st</sup> | 431    | 33 | 53.38          | 0.005                 |
|                   |         | 1     | 2 <sup>nd</sup> | 481    | 36 | 348.18         | 0.001 *               |
|                   |         | 2     | 2 <sup>nd</sup> | 481    | 33 | 188.11         | 0.001 *               |
|                   | Females | 1     | 1 <sup>st</sup> | 311    | 36 | 140.39         | 0.001 *               |
|                   |         | 2     | 1 <sup>st</sup> | 311    | 33 | 86.83          | 0.001 *               |
|                   |         | 1     | 2 <sup>nd</sup> | 455    | 36 | 170.15         | 0.001 *               |
|                   |         | 2     | 2 <sup>nd</sup> | 455    | 33 | 128.78         | 0.001 *               |
| Annual            | Males   | 1     | 1 <sup>st</sup> | 431    | 36 | 34.57          | 0.500                 |

|                              |         |   |                 |     |    |        |         |
|------------------------------|---------|---|-----------------|-----|----|--------|---------|
| quarter                      |         | 2 |                 |     | 33 | 27.50  | 0.700   |
|                              |         | 1 | 2 <sup>nd</sup> | 481 | 36 | 245.14 | 0.001 * |
|                              |         | 2 |                 |     | 33 | 110.42 | 0.001 * |
|                              | Females | 1 | 1 <sup>st</sup> | 311 | 36 | 114.17 | 0.001 * |
|                              |         | 2 |                 |     | 33 | 72.07  | 0.001 * |
|                              |         | 1 | 2 <sup>nd</sup> | 455 | 36 | 83.60  | 0.001 * |
|                              |         | 2 |                 |     | 33 | 72.89  | 0.001 * |
|                              | Males   | 1 | 1 <sup>st</sup> | 431 | 24 | 29.59  | 0.150   |
|                              |         | 2 |                 |     | 22 | 19.09  | 0.600   |
| Injury timing                |         | 1 | 2 <sup>nd</sup> | 481 | 24 | 19.13  | 0.700   |
|                              |         | 2 |                 |     | 22 | 25.75  | 0.250   |
|                              | Females | 1 | 1 <sup>st</sup> | 311 | 24 | 82.50  | 0.002   |
|                              |         | 2 |                 |     | 22 | 33.43  | 0.050   |
|                              |         | 1 | 2 <sup>nd</sup> | 455 | 24 | 131.80 | 0.002   |
|                              |         | 2 |                 |     | 22 | 69.65  | 0.010   |
|                              |         | 1 | 1 <sup>st</sup> | 102 | 36 | 41.56  | 0.200   |
|                              |         | 2 |                 |     | 33 | 22.01  | 0.900   |
|                              | Males   | 1 | 2 <sup>nd</sup> | 106 | 36 | 44.7   | 0.100   |
|                              |         | 2 |                 |     | 33 | 27.41  | 0.700   |
|                              |         | 1 | 1 <sup>st</sup> | 82  | 36 | 27.82  | 0.850   |
|                              |         | 2 |                 |     | 33 | 24.29  | 0.850   |
| Competition difficulty level |         | 1 | 2 <sup>nd</sup> | 76  | 36 | 28.80  | 0.750   |
|                              |         | 2 |                 |     | 33 | 33.76  | 0.400   |
|                              |         | 1 | 1 <sup>st</sup> | 86  | 36 | 40.83  | 0.250   |
|                              |         | 2 |                 |     | 33 | 40.27  | 0.150   |
|                              | Females | 1 | 2 <sup>nd</sup> | 97  | 36 | 42.67  | 0.200   |
|                              |         | 2 |                 |     | 33 | 12.53  | 0.990   |
|                              |         | 1 | 1 <sup>st</sup> | 40  | 36 | 15.46  | 0.990   |
|                              |         | 2 |                 |     | 33 | 17.98  | 0.975   |
|                              |         | 1 | 2 <sup>nd</sup> | 63  | 36 | 22.37  | 0.950   |
|                              |         | 2 |                 |     | 33 | 19.62  | 0.950   |

OSICS: (1) injury location, (2) injury type; IE: injury episodes; n: number of injury episodes; *df*: degrees of freedom;  $X^2$ : chi-square statistic; \* *p*<sub>adjusted</sub>: significance level  $\leq 0.001$ ; Pre: 1<sup>st</sup> (1997 - 2000); 2<sup>nd</sup> (2001-2004).

## DISCUSSION

The present study examine the effect of chronological age, weight category, annual quarter, injury timing, and competition difficulty level on injury location and type in elite Taekwondo athletes. The anatomical sites with more injury incidence correspond to the lower limbs (knee, foot, ankle, thigh and lower leg) for both males and females. These anatomical locations are related to different injury types, prevailing contusions, joint and cartilage injuries and, in smaller proportion, tendon and muscle injuries. Chronological age, weight category and annual quarter, are the variables that show a statistically significant relation as possible injury risk factors in elite taekwondo. In the opposite direction, the injury timing and competition difficulty level does not seem to have any relationship with the injury prevalence in this combat sport.

The present study has some limitations to be considered. First, and perhaps the most important, not correspond to a prospective and/or longitudinal study design (it was not possible, for example, to determine when the injury exactly occurred, or to calculate injury rates with adequate accuracy, or to possess previous injury information, or a training load indicator). Second, despite the high number of IE, there is a low number of elite taekwondists included that can possibly result in relevant bias.

### *Injury location (OSICS-1) and injury type (OSICS-2)*

Spanish males taekwondists present higher IE than women, however there is no statistically proven difference found. Recent studies reported similar findings. [29-35] Past research cites the most common injury locations as the lower limb. [17, 24, 31, 32, 34, 36-39] This is not surprising due to the use of the lower limb as the primary striking weapon. There are no significance differences between sexes in knee injuries, that's a surprising finding because according to many research papers being a female is a risk factor to suffer from more knee injuries. [40-42] It could be possible that this risk factor

1  
2  
3 is minimized because both sexes train and do the same prevention programs, an  
4 uncommon aspect in other sports. Foot is the second location with more number of  
5 episodes, not rear if we know that the majority of kick techniques use the foot. Some  
6 authors affirm that 98 out of 100 hundred kicking techniques are executed with the foot.  
7  
8 [43, 44] Chest, thoracic column and abdomen are the locations with less number of  
9 episodes, it could be related to the use of protections in these zones during training  
10 sessions and competitions. The prevalence of contusions, joint and cartilage injuries, is  
11 in accordance with the related literature. [26, 30] It's logical because the practitioners  
12 are constantly kicking each other.  
13  
14  
15  
16  
17  
18  
19  
20  
21

### 22 ***Risk factors (dependent variables)***

23  
24 According to sex, the highest injury prevalence occurs at different chronological ages.  
25 From 23 to 24 years old in males, from 17 to 18 years old in females. There are many  
26 related studies that found a significance correlation between chronological age and  
27 injury incidence. [16, 22, 24, 35-37] (I=The data of this study confirm the same results,  
28 indicating the chronological age as a potential risk factor for injury incidence in elite  
29 taekwondo athletes.  
30  
31  
32  
33  
34  
35  
36  
37  
38

39 Sex differences according to the weight category is a clear indicator that men  
40 suffer more injuries in all weight categories with the exception of intermediate category.  
41 This exception is explained by the fact that there are fewer cases of male taekwondo  
42 athletes represented. Moreover, the weight category emerges as a possible injury risk  
43 factor.  
44  
45  
46  
47  
48  
49  
50

51 All sports planning training system varies depending on the competitive calendar  
52 and, consequently, on the season annual periods. In the present study, this fact seems to  
53 condition the injury pattern of taekwondo athletes, and it can be considered as a risk  
54 factor by coaches and sports medicine specialists.  
55  
56  
57  
58  
59  
60

1  
2  
3 Finally, in all the variables that could be considered as risk factors were recorded  
4  
5 some differences according to sex and/or different OP. The first OP, regarding to  
6  
7 chronological age (males and females, and OSICS-1 and OSICS-2) , the weight  
8  
9 category (males OSICS-2), and specially in the annual period (males OSICS-1 and  
10  
11 OSICS-2), seems to record a different behavior as a risk factor injuries causes. Although  
12  
13 the retrospective nature of this study the training load was not recorded, it is known that  
14  
15 the Spanish responsible coaches were different during the two analyzed OP. Different  
16  
17 training systems, applied in a certain way for both genders, could be on of the reasons  
18  
19 for these results. Therefore, each sporting context should be specifically analyzed to  
20  
21 assess the full dimension of the elite injury epidemiology in taekwondo.  
22  
23  
24

## 25 26 CONCLUSIONS

27  
28 The anatomical sites with more injury incidence correspond to the knee, foot, ankle,  
29  
30 thigh, and lower leg. In SNT prevailing contusions, joint and cartilage injuries.  
31  
32 Chronological age, weight category, and annual quarter, show a statistically significant  
33  
34 relation as possible injury risk factors according to sex or different OP. The present  
35  
36 study has some limitations to be considered: not correspond to a prospective and/or  
37  
38 longitudinal study design; despite the high number of IE, there is a low number of elite  
39  
40 taekwondists included. This study provide epidemiological information that will help to  
41  
42 inform future injury surveillance studies. Further research is needed to achieve a better  
43  
44 understanding of elite taekwondo, in relation to sex and different training systems.  
45  
46  
47  
48  
49

50 What are the new findings?

- 51 - OSICS classification appears to be sensitive to classifying the injury location
- 52 and type, and to discriminate potential injury risk factors.
- 53 - Lower limb injuries including knee, foot, ankle, thigh, and lower leg, are
- 54 more common than upper limb injuries.
- 55 - Contusions, joint and cartilage injuries and, in smaller proportion, tendon and
- 56 muscle injuries, are the prevailing anatomical types of injury.
- 57
- 58
- 59
- 60

- Chronological age, weight category and the annual quarter can be considered as risk factors to sustain injuries in elite taekwondo according to their location and type.
- All recorded risk factors are likely to have a greater or lesser dependence according to gender or different OP registered.

#### How might it impact on clinical practice in the near future?

- Clinicians taking care of athletes are now aware of different patterns of injuries in Taekwondo practitioners.
- It can start the development of prevention strategies and recommendations to reduce the number of injuries in taekwondo.
- Although the results described here and that we can use as a guide, each sporting context, adjusted to each training system must be analysed specifically.

Figure 1: Injury location episodes according to two Olympic periods and sex of the athletes. 1Pelvis and buttock; 2Chest, trunk, abdomen and thoracic spine; 3Shoulder, upper arm, elbow, forearm; 4Hip and groin; 5Lumbar spine; 6Wrist and hand; M: males; F: females.

Figure 2: Injury type episodes according to two Olympic periods and sex of the athletes. 1Arthritis, cartilage injuries, synovitis, impingements, bursitis and chronic instability; 2Joint dislocations and joint sprains; 3Stress fractures, other stress and overuse injuries; 4Whiplash and non-specific injuries; M: males; F: females.

#### ACKNOWLEDGMENTS

The authors would like to express their gratitude to the athletes who participated in the study, as well as to the technical staff and medical department of the National Taekwondo Federation.

#### FOOTNOTES

**Contributorship statement:** All the authors contributed in a substantial manner to the planning and conduction of the testing, literature review and/or manuscript preparation. Conceived and designed: AAB, FD, AI. Analysed the data: AAB, JBM, AI. Contributed

1  
2  
3 reagents/materials/analysis tools: AAB, LT, JBM, AI. Wrote the paper: AAB, FD, NM,  
4 AI. They all gave final approval of the version submitted.  
5  
6

7 **Funding:** The study was supported by grants from the Agency for Management of  
8 University and Research Grants (AGAUR) the Catalan National Institute of Physical  
9 Education (Institut Nacional d'Educació Física de Catalunya) and the High Performance  
10 Centre (Centre Alt Rendiment Esportiu), Generalitat de Catalunya; resolution :  
11 VCP/3346/2009.  
12  
13  
14

15 **Competing interests:** None.  
16  
17

18 **Ethics approval:** The study protocol was approved by the Ethics Sports Clinical  
19 Investigations Committee.  
20  
21  
22

23 **Data sharing statement:** Extra data is available by emailing AAB.  
24  
25

## 26 REFERENCES

27

28 1-World-Taekwondo-Federation. [http://www.wtf.org/wtf\\_eng/main/main\\_eng.html](http://www.wtf.org/wtf_eng/main/main_eng.html).

29 Accessed [29/04/13].  
30  
31  
32

33 2-Heller J, Peric T, Dlouha R, et al. Physiological profiles of male and female  
34 taekwondo (ITF) black belts. *J Sports Sci* 1998;**16**:243-49.  
35  
36  
37

38 3-Gao B. Research on the somatotype features of chines elite male taekwondo athletes.  
39 *Sport Science* 2001;**21**:58-61.  
40  
41  
42

43 4-Melhim A. Aerobic and anaerobic power responses to the practice of taekwondo. *Br J*  
44 *Sports Med* 2001;**35**:231-35.  
45  
46  
47

48 5-Ball N, Nolan E, Wheeler K. Anthropometrical, physiological, and tracked power  
49 profiles of elite taekwondo athletes 9 weeks before the olympic competition phase.  
50 *Journal of Strength and Conditioning Research / National Strength & Conditioning*  
51 *Association* 2011;**25**(10):2752-63.  
52  
53  
54  
55  
56  
57  
58  
59  
60

- 1  
2  
3 6-Estevan I, Alvarez O, Falco, C, et al. Impact force and time analysis influenced by  
4  
5 execution distance in a roundhouse kick to the head in taekwondo. *Journal of*  
6  
7 *Strength and Conditioning Research / National Strength & Conditioning*  
8  
9 *Association* 2011;**25**(10):2851-56.  
10  
11  
12  
13 7-Grosser M, Brüggemann P, Zintl F. *Alto rendimiento: planificación y desarrollo.*  
14  
15 Madrid: Martínez Roca, 1989.  
16  
17  
18 8-González de Prado C. *Caracterización técnico-táctica de la competición de combate*  
19  
20 *de alto nivel en taekwondo. efectividad de las acciones tácticas* [dissertation].  
21  
22 Barcelona, Universitat de Barcelona, 2011.  
23  
24  
25  
26 9-Bridge CA, Jones MA, Drust B. The activity profile in international taekwondo  
27  
28 competition is modulated by weight category. *International Journal of Sports*  
29  
30 *Physiology and Performance* 2011;**6**(3):344-57.  
31  
32  
33  
34 10-Cular D, Krstulovic S, Tomljanovic M. The differences between medalists and non  
35  
36 medalists at the 2008 olympic games taekwondo tournament. *Human Movement*  
37  
38 2011;**12**(2):165-70.  
39  
40  
41  
42 11-Hardy L, Jones G, Gould D, eds. *Understanding psychological preparation for*  
43  
44 *sport*. New York: John Wiley and Sons, 1996.  
45  
46  
47  
48 12-Falcó C, Alvarez O, Castillo I, et al. Influence of the distance in a roundhouse kick's  
49  
50 execution time and impact force in taekwondo. *J Biomech* 2009;**42**(3):242-48.  
51  
52  
53  
54 13-González de Prado C, Iglesias X, Mirallas J, et al. Sistematización de la acción  
55  
56 táctica en el taekwondo de alta competición. *Apunts. Educación Física y Deportes*  
57  
58 2011;**103**:56-67.  
59  
60



- 1  
2  
3 14-Junge A, Engebretsen L, Alonso JM, et al. Injury surveillance in multi-sport events:  
4  
5 The international olympic committee approach. *Br J Sports Med* 2008;**42**(6):413-  
6  
7 21.  
8  
9  
10  
11 15-Feehan M, Waller AE. Precompetition injury and subsequent tournament  
12  
13 performance in full-contact taekwondo. *Br J Sports Med* 1995;**29**(4):258-62.  
14  
15  
16 16-Beis K, Tsaklis P, Pieter W, et al. Taekwondo competition injuries in greek young  
17  
18 and adult athletes. *European Journal Sports Traumatology and Related Research*  
19  
20 2001;**23**:130-36.  
21  
22  
23  
24 17-Lystad RP, Pollard H, Graham PL. Epidemiology of injuries in competition  
25  
26 taekwondo: A meta-analysis of observational studies. *Journal of Science and*  
27  
28 *Medicine in Sport / Sports Medicine Australia* 2009;**12**(6):614-21.  
29  
30  
31  
32 18-Schluter-Brust K, Leistenschneider P, Dargel J, et al. Acute injuries in taekwondo.  
33  
34 *Int J Sports Med* 2011;**32**(8):629-34.  
35  
36  
37  
38 19-Kazemi M. Relationships between injury and success in elite taekwondo athletes. *J*  
39  
40 *Sports Sci* 2012;**30**(3):277-83.  
41  
42  
43  
44 20-Pieter W, Fife GP, O'Sullivan DM. Competition injuries in taekwondo: A literature  
45  
46 review and suggestions for prevention and surveillance. *Br J Sports Med*  
47  
48 2012;**46**(7):485-91.  
49  
50  
51  
52 21-Engebretsen L, Soligard T, Steffen K, et al. Sports injuries and illnesses during the  
53  
54 London Summer Olympic Games 2012. *Br J Sports Med* 2013;**47**:407-14.  
55  
56  
57  
58 22-Pieter W, Zemper ED. Head and neck injuries in young taekwondo athletes. *The J*  
59  
60 *Sports Med Phys Fitness* 1999b;**39**(2):147-53.

- 1  
2  
3 23-Zetou E. Injuries in taekwondo athletes. *Physical Training*.  
4  
5 [http://ejmas.com/pt/2006pt/ptart\\_Zetou\\_0906.html](http://ejmas.com/pt/2006pt/ptart_Zetou_0906.html) (accessed 30 May 2013).  
6  
7  
8  
9 24-Kazemi M., Shearer H, Choung YS. Pre-competition habits and injuries in  
10 taekwondo athletes. *BMC Musculoskeletal Disorders* 2005;**6**:26.  
11  
12  
13  
14 25-Pieter W. Taekwondo. In: Kordi R, Mafulli N, Wroble RR, Wallace WA, eds.  
15 *Combat sports medicine*. London: Springer, 2009:263-86.  
16  
17  
18  
19 26-Til L, Orchard J, Rae K. El sistema de classificació i codificació OSICS-10 traduït  
20 de l'anglès. *Apunts Medicina De L'Esport* 2008;**43**(159), 109.  
21  
22  
23  
24  
25 27- Directive 95/46/EC of the European Parliament and of the Council of 24 October  
26 1995 on the protection of individuals with regard to the processing of personal data  
27 and on the free movement of such data, OJ L 281, 23.11.1995, p.31.  
28  
29  
30  
31  
32  
33 28-Hagglund M, Walden M, Bahr R, et al. Methods for epidemiological study of  
34 injuries to professional football players: Developing the UEFA model. *Br J Sports*  
35 *Med* 2005;**39**(6):340-46.  
36  
37  
38  
39  
40  
41 29-Birrer RB. Trauma epidemiology in the martial arts. the results of an eighteen-year  
42 international survey. *Am J Sports Med* 1996;**24**(6 Suppl):S72-9.  
43  
44  
45  
46 30-Kazemi M, Pieter W. Injuries at the canadian national tae kwon do championships:  
47 A prospective study. *BMC Musculoskeletal Disorders* 2004;**5**:22.  
48  
49  
50  
51  
52 31-Pieter W, Van Ryssegem G, Lufting R, et al. Injury situation and injury mechanism  
53 at the 1993 european taekwondo cup. *Journal of Human Movement Studies*  
54 1995;**28**(I):1-24.  
55  
56  
57  
58  
59  
60

- 1  
2  
3 32-Pieter W, Bercades LT, Heijmans J. Injuries in young and adult taekwondo athletes.  
4  
5 *Kines* 1998;**30**(I):22-30.  
6  
7  
8  
9 33-Pieter W, Zemper ED. Injuries in adult american taekwondo athletes. *Fifth IOC*  
10  
11 *World Congress on Sports Sciences*; 31 October-15 November 1999, Sydney.  
12  
13 Australia. 1999a.  
14  
15  
16 34-Zemper ED, Pieter W. Injury rates during the 1988 US olympic team trials for  
17  
18 taekwondo. *Br J Sports Med* 1989;**23**(3):161-64.  
19  
20  
21  
22 35-Zetaruk MN, Violan MA, Zurakowski D, et al. Injuries in martial arts: A comparison  
23  
24 of five styles. *Br J Sports Med* 2005;**39**(1):29-33.  
25  
26  
27 36-Kazemi M, Chudolinski A, Turgeon M, et al. Nine year longitudinal retrospective  
28  
29 study of taekwondo injuries. *The Journal of the Canadian Chiropractic Association*  
30  
31 2009;**53**(4):272-81.  
32  
33  
34  
35 37-Siana J, Borum P, Kryger H. Injuries in taekwondo. *Br J Sports Med*  
36  
37 1986;**20**(4):165-66.  
38  
39  
40  
41 38-Cunningham C, Cunningham S. Injury surveillance at a national multi-sport event.  
42  
43 *Aust J Sci Med Sport* 1996;**28**(2):50-56.  
44  
45  
46 39-Kim EH, Kim YS, Toun SW, et al. Survey and analysis of sports injuries and  
47  
48 treatment patterns among korean national athletes. *Korean Journal Sports Science*  
49  
50 1994;**6**(1):33-56.  
51  
52  
53  
54 40-Myklebust G, Maehlum S, Holm I, et al. A prospective cohort study of anterior  
55  
56 cruciate ligament injuries in elite norwegian team handball. *Scand J Med Sci Sports*  
57  
58 1998;**8**(3):149-53.  
59  
60

1  
2  
3 41-Myklebust G, Engebretsen L, Braekken IH, et al. Prevention of anterior cruciate  
4 ligament injuries in female team handball players: A prospective intervention study  
5 over three seasons. *Clinical Journal of Sport Medicine : Official Journal of the*  
6  
7  
8  
9  
10 *Canadian Academy of Sport Medicine* 2003;**13**(2):71-78.

11  
12  
13 42-Soderman K., Alfredson H, Pietila T, et al. Risk factors for leg injuries in female  
14 soccer players: A prospective investigation during one out-door season. *Knee Surg*  
15  
16  
17 *Sports Traumatol Arthrosc* 2001;**9**(5):313-21.

18  
19  
20 43-Kazemi M, Waalen J, Morgan C, et al. A profile of olympic taekwondo competitors.  
21  
22  
23 *Journal of Sports Science and Medicine (CSSI)* 2006;114-21.

24  
25  
26 44-Kazemi M, Perri G, Soave D. A profile of 2008 olympic taekwondo competitors.  
27  
28  
29  
30  
31  
32  
33  
34  
35  
36  
37  
38  
39  
40  
41  
42  
43  
44  
45  
46  
47  
48  
49  
50  
51  
52  
53  
54  
55  
56  
57  
58  
59  
60  
*The Journal of the Canadian Chiropractic Association* 2010;**54**(4):243-49.

1  
2  
3  
4  
5  
6  
7 **Epidemiology of injuries in elite taekwondo athletes: two Olympic**  
8 **periods cross-sectional retrospective study**  
9

10  
11 **Albert Altarriba-Bartes** <sup>1,2</sup>

12 C/ Costabona 74, 17500 Ripoll (Girona) SPAIN

13 [albertaltarriba@hotmail.com](mailto:albertaltarriba@hotmail.com) or [altarribartes@gmail.com](mailto:altarribartes@gmail.com)

14 +34666911893 or +19733687224  
15  
16  
17  
18  
19

20  
21 **Franchek Drobic MD, PhD** <sup>3,4</sup>, **Lluís Til MD** <sup>2,4</sup>, **Nikolaos Malliaropoulos MD,**  
22 **MSc, PhD** <sup>5,6</sup>, **José Bruno Montoro PhD** <sup>7</sup>, **Alfredo Irurtia PhD** <sup>8</sup>  
23

24  
25 <sup>1</sup>New York Red Bulls Performance Department, New York, United States of America.

26  
27 <sup>2</sup>Care and Preventive Sport Unit (UAPE-CAR). Health Consortium of Terrassa - High  
28 Performance Sports Center of Sant Cugat del Vallés, Spain.  
29

30  
31 <sup>3</sup>Research Department of High Performance Sports Center, Sant Cugat del Vallés,  
32 Spain.  
33

34  
35 <sup>4</sup>Medical Services of FC Barcelona, Barcelona, Spain.  
36

37  
38 <sup>5</sup>National Track & Field Center, Sports Injury Clinic, Sports Medicine Clinic of  
39 S.E.G.A.S., Thessaloniki, Greece.  
40

41  
42 <sup>6</sup>Thessaloniki Sports Medicine Clinic, Greece.  
43

44  
45 <sup>7</sup>University Hospital of Vall d'Hebron, Pharmacology Department, Barcelona, Spain.  
46

47  
48 <sup>8</sup>National Institute of Physical Education of Catalonia, University of Barcelona, Sports  
49 Performance Department, Barcelona, Spain.  
50

51  
52 Olympics, Martial Arts, Taekwondo, Sporting injuries, Epidemiology, Injury Prevention  
53

54 | *Word count – ~~2854~~2940 words*  
55  
56  
57  
58  
59  
60

## ABSTRACT

**Background:** Taekwondo is a popular Korean martial art characterised by its emphasis on dynamic kicking techniques. Taekwondo has been included in the Olympic Games program since 2000 Sydney Olympic Games. Although it is becoming an increasingly popular sport, there is a lack of reliable epidemiologic data on Taekwondo injuries.

**Aim:** This analytical cross-sectional retrospective cohort study aims to describe reported Taekwondo injuries and to determine the prevalence, characteristics and possible injury risk factors sustained by the Spanish National Team athletes. Additionally, we compared each identified risk factor, such as: age, weight category, annual quarter, injury timing and competition difficulty level, with ~~its~~ relation to injury location and type.

**Methods:** This study was a summation of two Olympic periods, eight years, of data of injury reports, which included 1678 injury episodes. The data were collected on standardized injury reports at time of the first medical visit. The data analysis was performed at the High Performance Sports Center in Sant Cugat del Vallés (Barcelona, Spain).

**Results:** ~~Lower limb injuries are~~Independently of sex or Olympic period, the anatomical sites with more common than upper limb injuries-injury episodes, are: knee (21.3%), foot (17.0%), ankle (12.2%), thigh (11.4%), and lower leg (8.8%). Contusions, ~~joint and~~ (29.3%), cartilage (17.6%), and joint (15.7%) injuries, are the prevailing types of injury. Chronological age ~~and the~~ weight categories and the annual quarter can be considered as risk factors to sustain injuries in male and female elite taekwondist according to their location and type: (p<0.001).

**Conclusions:** The present study provides epidemiological information that will help to inform future injury surveillance studies and the development of prevention strategies

Formatted: Space After: 6 pt

1  
2  
3  
4  
5  
6 and recommendations to reduce the number of injuries in taekwondo competition.  
7  
8

9  
10  
11 **STRENGTHS AND LIMITATIONS**

- 12  
13  
14 • A large analytical cross-sectional study over a 8-year period and the new  
15 findings of different associations between risk factors to sustain an injury and its  
16 location and type in elite taekwondo athletes were among the main strengths.  
17  
18  
19 • Retrospective nature and unavailability of some relevant data.  
20  
21  
22  
23  
24  
25  
26  
27  
28  
29  
30  
31  
32  
33  
34  
35  
36  
37  
38  
39  
40  
41  
42  
43  
44  
45  
46  
47  
48  
49  
50  
51  
52  
53  
54  
55  
56  
57  
58  
59  
60

## INTRODUCTION

Taekwondo is a systematic and scientific Korean age-old martial art that involves multiple physical fighting skills. This fully recognized Olympic sport is regulated by the World Taekwondo Federation and is considered one of the most worldwide popular sports, with a range of 75 to 120 million practitioners in more than 140 countries. Spain is in the top of current medals ranking in the last London 2012 Olympic Games and represent one of the most traditional countries in terms of international sporting success [1].

Taekwondo competitive performance depends on several factors, including physical [2-6], psychological [7, 8], technical [9, 10], and tactical [11-13]. Their practitioners compete according to sex and defined weight categories classification in a full-contact event of two opponents divided in three semi-continuous rounds of two minutes, with one minute's rest between rounds. Taekwondists are equipped with a padded trunk protector, protective padded headgear, protective gloves, and shin guards. Victory is achieved by higher scores given by judges for the specific fighting techniques allowed (kicks and punches), accurately and powerfully, in the legal scoring areas (the abdomen and both sides of the flank; the permitted parts of the face).

Understanding the injury pattern of a particular sport and its inherent risk factors, is a key area of current sports medicine [14]. As within many other combat sports, there is a high potential for injury associated with elite athletic performance in taekwondo [15-21]. Defining injury as any circumstance for which the athlete sought the assistance of the on-site medical personnel, the latest reviews about competition



1  
2  
3  
4  
5  
6 injuries in taekwondo concluded that total injury rates for elite men ranged from 20.6 to  
7  
8 139.5 per 1000 athlete-exposure (A-E), and for elite women between 25.3 to 105.5 per  
9  
10 1000 A-E. When only time-loss injuries are contemplated, rates for men varied from  
11  
12 6.9 to 33.6 per 1000 A-E and for women from 2.4 to 23.0 per 1000 A-E [20].  
13

14  
15 The main injury mechanism in taekwondo is the direct contact, especially  
16  
17 through the exchange of accurate turning kicks and poorly performed or nonexistent  
18  
19 blocking skills [17, 20, 22, 23]. The vast majority of all injuries are localized to the  
20  
21 lower extremities, especially in the instep of the foot, and these are contusions, sprains  
22  
23 and muscle strains [17, 20, 24, 25]. The head and the neck regions are the next  
24  
25 anatomical locations with an increased prevalence in taekwondo competition injuries  
26  
27 [17, 20].  
28

29  
30 Despite the well-documented epidemiology injury profile in taekwondo  
31  
32 competition, relatively few studies have evaluated the incidence of injury risk factors  
33  
34 related to the training process and long-term preparation in elite level. The main  
35  
36 objective of this eight years cross-sectional retrospective cohort study was to determine  
37  
38 the prevalence, characteristics (anatomical location and injury type), and possible injury  
39  
40 risk factors sustained by male and female Spanish National Team (SNT) taekwondists  
41  
42 trained in the High Performance Sports Center (CAR) in Sant Cugat del Vallés  
43  
44 (Barcelona, Spain) throughout two different Olympic periods (Sydney 1997 – 2000 and  
45  
46 Athens 2001 – 2004).  
47

## 48 **METHODS**

### 49 **Type of study**

50  
51 This study is a large analytical cross-sectional retrospective cohort study over eight  
52  
53 years, divided into two different four years Olympic periods (OP).  
54  
55  
56  
57  
58  
59  
60

### Study participants

From the 1<sup>st</sup> of January 1997 through the 31<sup>st</sup> of December 2004, a total of 48 taekwondo athletes from the SNT were studied. There were 22 male and 26 female athletes (45.8% and 54.2% of all athletes, respectively). The mean (+SD) age of the athletes in this study was 21.6±1.2 years (minimum=15 years, maximum=31 years). The inclusion criteria were 1) to have trained for the national taekwondo group for a minimum of one sports season, and 2) being a member of the SNT.

### Data collection and injury report form

Two data sources were utilized. The first source was a comprehensive database obtained from the CAR, to provide personal and general information about each athlete. The second data source was from an electronic medical data capture system from the CAR sports medical department. This contained the following data fields in an unidentified format: athlete accreditation number, sex, age, date of first registration at CAR, weights category, medical visit date (day/month/year), and injury diagnosis. All injuries were diagnosed by sports medicine doctors, and subsequently recorded by anatomical location (OSICS-1) and injury type (OSICS-2) according to Orchard Sports Injury Classification System, V.10 (OSICS-10) [26]. The system of data entry and storage complied with existing European Union standards for medical data storage [27].

### Procedures

The total number of injury episodes (n=1678; males: n=912; females: n=766) were obtained and analysed individually for every elite taekwondist classified by sex and OP. Definition of injury episodes (IE) corresponds to the series of medical visits sustained by an athlete, related to the same injury (same OSICS coding) and occurred no more

1  
2  
3  
4  
5  
6 than two months apart from each other. If the time between them is greater than two  
7  
8 months, this is classified as a new episode. We determined this length of time according  
9  
10 to the definition of reinjury proposed by Hagglund [28]: “an injury of the same type and  
11  
12 location of a previous injury that occurred within two months of the final rehabilitation  
13  
14 day of the previous injury”. Additionally, has been included a severity index of injuries,  
15  
16 based on the number of medical visits (MV) generated by an IE (more MV, more injury  
17  
18 severity). Results related to MV are shown as online supplement data.  
19

20  
21 Analysed variables used were: chronological age (expressed in years, and three  
22  
23 age groups: from 15 to 20 years old, 21 to 25 years old, and 26 to 31 years old); weight  
24  
25 category (very light, light, medium, and heavy); annual quarter when injury occurs;  
26  
27 injury timing (pre-competition: fifteen days before the beginning of the competition;  
28  
29 competition and/or post-competition: all the injuries sustained in competition and/or  
30  
31 within the next fifteen days after the last day of competition; out of competition or  
32  
33 during training sessions); competition difficulty level (World Championships –WC–,  
34  
35 World Cups –WCU–, European Championships –EUC–, National Championships –  
36  
37 WC–), which includes as pre-competition injuries all the injuries registered during the  
38  
39 fifteen days before the first day of competition and as post-competition injuries all the  
40  
41 injuries registered during the days of competition and/or within the next fifteen days  
42  
43 after the last day of competition.  
44

#### 45 **Definition of injury**

46  
47 This study adhered to the operational injury definitions recommended by Junge *et al.*,  
48  
49 [14], thus an injury was defined as new or recurring musculoskeletal complaints or  
50  
51 concussions incurred during competition or training receiving medical attention,  
52  
53 regardless of time loss from competition or training.  
54

#### 55 **Confidentiality and ethical approval**

1  
2  
3  
4  
5  
6 Research ethics approval was obtained from the Ethics Sports Clinical Investigations  
7  
8 Committee of Catalonia (ID-0099S/10308/2011). The investigators obtained the  
9  
10 informed consent from the subjects to access and collect past medical history data and  
11  
12 voluntarily participated in the study. All data were stored on highly secured, password-  
13  
14 protected files. The investigators signed a confidentiality agreement that states all data  
15  
16 gathered during the duration of the study will be utilized solely for the purpose of the  
17  
18 investigation.

### 20 21 **Statistical analysis**

22  
23 Data are expressed as the number of IE and presented by the standard basic descriptive  
24  
25 statistics of mean and standard deviation. The injury classification (OSICS-1:  
26  
27 anatomical location; OSICS-2: injury type) and the independent variables  
28  
29 (chronological age, weight category, annual quarter, injury timing, competition  
30  
31 difficulty level) were analysed in relation to sex and OP. In order to compare the  
32  
33 differences between both OP or between sexes, a Student's t-test or analogue non-  
34  
35 parametric Mann-Whitney U test were performed, depending on whether the data were  
36  
37 normally distributed or not, respectively. In order to analyze the probability of  
38  
39 considering a risk factor, or a possible behavior-dependent generator between the  
40  
41 injuries (by the criterion of OSICS classification) and each of the independent variables,  
42  
43 we used the Pearson Chi-squared test, and adjusted odds ratio (OR). We regarded two-  
44  
45 tailed p Bonferroni adjusted values  $\leq 0.05001$  as significant. All statistical modeling was  
46  
47 performed using SPSS<sup>®</sup> 19.0 (SPSS Inc. Chicago, USA).

Formatted: Superscript

## 48 49 **RESULTS**

### 50 51 **OSICS-1 classification (anatomical sites)**

Independently of sex or OP, the anatomical sites (~~OSICS 1~~) with more IE, are (~~TableFigure 1~~): knee, foot, ankle, thigh, ~~ankle~~, and lower leg.

Table 1. OSICS 1: injury location episodes according to two Olympic periods and sex of the athletes.

| Injury location           | Males           |      |                 |      | Females         |      |                 |      |
|---------------------------|-----------------|------|-----------------|------|-----------------|------|-----------------|------|
|                           | 1 <sup>st</sup> |      | 2 <sup>nd</sup> |      | 1 <sup>st</sup> |      | 2 <sup>nd</sup> |      |
|                           | (n)             | (%)  | (n)             | (%)  | (n)             | (%)  | (n)             | (%)  |
| Ankle                     | 58              | 13.5 | 35              | 7.3  | 68              | 21.9 | 44              | 9.7  |
| Pelvis <sup>1</sup>       | 8               | 1.9  | 15              | 3.1  | 10              | 3.2  | 8               | 1.8  |
| Chest <sup>2</sup>        | 16              | 3.7  | 4               | 0.8  | 1               | 0.3  | 7               | 1.5  |
| Shoulder <sup>3</sup>     | 15              | 3.5  | 14              | 2.9  | 7               | 2.3  | 6               | 1.3  |
| Foot                      | 104             | 24.1 | 68              | 14.1 | 56              | 18.0 | 57              | 12.5 |
| Hip <sup>4</sup>          | 19              | 4.4  | 25              | 5.2  | 9               | 2.9  | 10              | 2.2  |
| Head and neck             | 10              | 2.3  | 3               | 0.6  | 13              | 4.2  | 13              | 2.9  |
| Knee                      | 83              | 19.3 | 101             | 21.0 | 56              | 18.0 | 118             | 25.9 |
| Lumbar Spine <sup>5</sup> | 23              | 5.3  | 36              | 7.5  | 17              | 5.5  | 35              | 7.7  |
| Lower leg                 | 19              | 4.4  | 62              | 12.9 | 27              | 8.7  | 40              | 8.8  |
| Thigh                     | 47              | 10.9 | 55              | 11.4 | 24              | 7.7  | 66              | 14.5 |
| Wrist <sup>6</sup>        | 22              | 5.1  | 53              | 11.0 | 17              | 5.5  | 41              | 9.0  |
| Unspecific                | 7               | 1.6  | 10              | 2.1  | 6               | 1.9  | 10              | 2.2  |

n: number of injury episodes; 1<sup>st</sup> (1997-2000); 2<sup>nd</sup> (2001-2004); <sup>1</sup>Pelvis and buttock; <sup>2</sup>Chest, trunk, abdomen and thoracic spine; <sup>3</sup>Shoulder, upper arm, elbow, forearm; <sup>4</sup>Hip and groin; <sup>5</sup>Lumbar spine; <sup>6</sup>Wrist and hand.

Formatted: Font: 10 pt, Font color: Black

Formatted: Line spacing: single

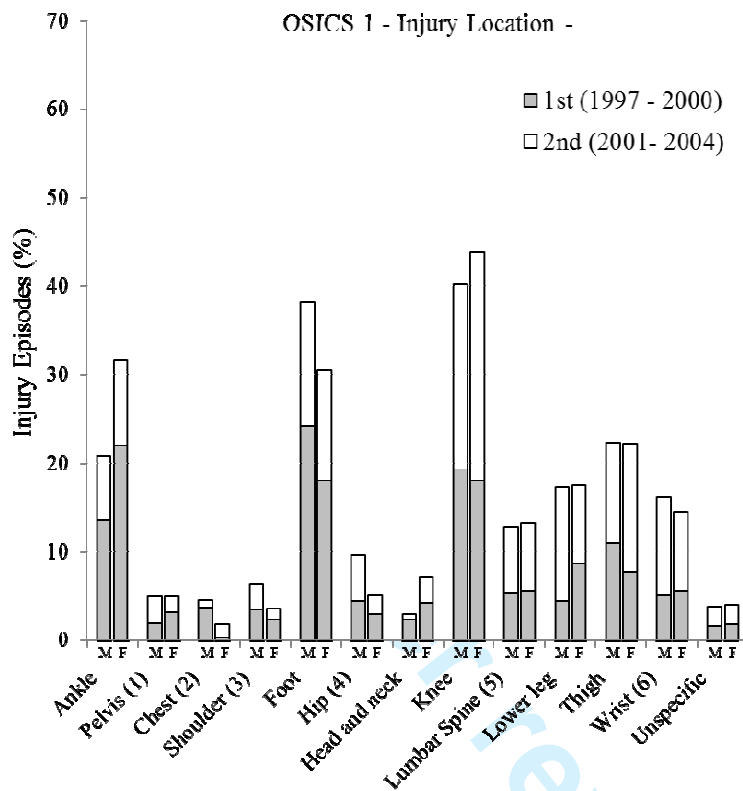

Figure 1: Injury location episodes according to two Olympic periods and sex of the athletes. <sup>1</sup>Pelvis and buttock; <sup>2</sup>Chest, trunk, abdomen and thoracic spine; <sup>3</sup>Shoulder, upper arm, elbow, forearm; <sup>4</sup>Hip and groin; <sup>5</sup>Lumbar spine; <sup>6</sup>Wrist and hand; M: males; F: females.

Formatted: Font: Not Bold, Font color: Auto

### OSICS-2 classification (injury type)

Independently of sex or OP, the type of injury (OSICS 2) with more IE, are (Table Figure 2): bruising/hematomas (contusions); joint dislocations and joint sprains; arthritis, cartilage injuries, synovitis, impingements, bursitis and chronic instability; muscle injuries; tendon injuries.

Formatted: Font: 10 pt, Font color: Black

Table 2. OSICS-2: injury type episodes according to two Olympic periods and sex of the athletes.

| Injury type               | Males           |      |                 |      | Females         |      |                 |      |
|---------------------------|-----------------|------|-----------------|------|-----------------|------|-----------------|------|
|                           | 1 <sup>st</sup> |      | 2 <sup>nd</sup> |      | 1 <sup>st</sup> |      | 2 <sup>nd</sup> |      |
|                           | (n)             | (%)  | (n)             | (%)  | (n)             | (%)  | (n)             | (%)  |
| Cartilage <sup>1</sup>    | 70              | 16.2 | 73              | 15.2 | 66              | 21.2 | 87              | 19.1 |
| Luxations <sup>2</sup>    | 78              | 18.1 | 68              | 14.1 | 53              | 17.0 | 64              | 14.1 |
| Fractures                 | 26              | 6.0  | 33              | 6.9  | 6               | 1.9  | 6               | 1.3  |
| Bruising/Hematoma         | 129             | 29.9 | 141             | 29.3 | 89              | 28.6 | 133             | 29.2 |
| Laceration/Abrasion       | 8               | 1.9  | 2               | 0.4  | 6               | 1.9  | 2               | 0.4  |
| Muscle                    | 44              | 10.2 | 72              | 15.0 | 31              | 10.0 | 74              | 16.3 |
| Nerve                     | 1               | 0.2  | 5               | 1.0  | 1               | 0.3  | 2               | 0.4  |
| Organic                   | 1               | 0.2  | 1               | 0.2  | 0               | 0.0  | 1               | 0.2  |
| Stress <sup>3</sup>       | 14              | 3.2  | 22              | 4.6  | 11              | 3.5  | 15              | 3.3  |
| Tendon                    | 41              | 9.5  | 40              | 8.3  | 31              | 10.0 | 34              | 7.5  |
| Non-specific <sup>4</sup> | 1               | 0.2  | 2               | 0.4  | 1               | 0.3  | 2               | 0.4  |
| Absence                   | 18              | 4.2  | 22              | 4.6  | 16              | 5.1  | 35              | 7.7  |

n: number of injury episodes; 1<sup>st</sup> (1997-2000); 2<sup>nd</sup> (2001-2004); <sup>1</sup>Arthritis, cartilage injuries, synovitis, impingements, bursitis and chronic instability; <sup>2</sup>Joint dislocations and joint sprains; <sup>3</sup>Stress fractures, other stress and overuse injuries; <sup>4</sup>Whiplash and non-specific injuries.

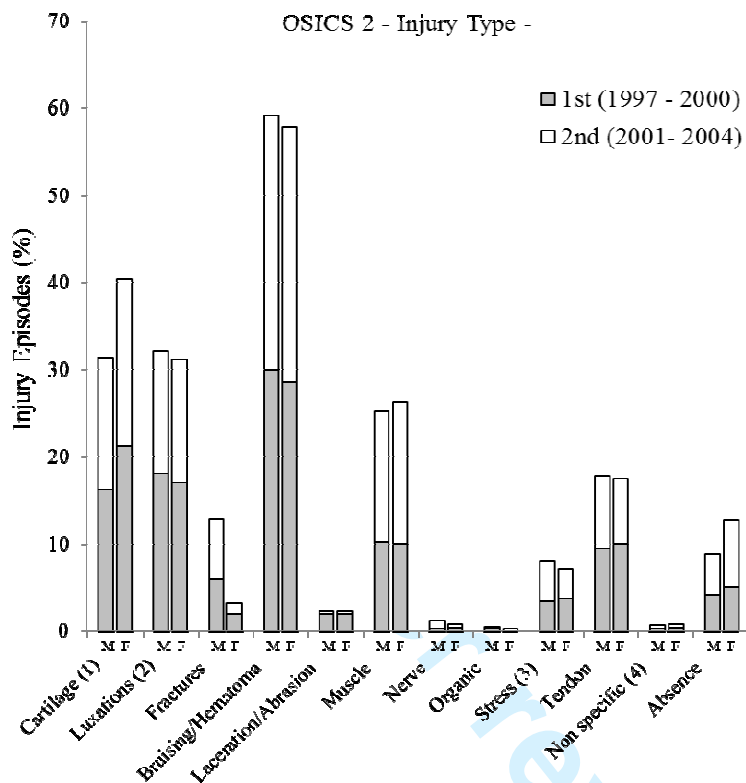

Figure 2: Injury type episodes according to two Olympic periods and sex of the athletes.<sup>1</sup>Arthritis, cartilage injuries, synovitis, impingements, bursitis and chronic instability; <sup>2</sup>Joint dislocations and joint sprains; <sup>3</sup>Stress fractures, other stress and overuse injuries; <sup>4</sup>Whiplash and non-specific injuries; M: males; F: females.

Formatted: Font: Not Bold, Font color: Auto

### Chronological age

IE significant differences were found between sexes during the first OP, in the chronological age groups of 21 to 25 years old (males:  $48.8 \pm 11.9$  vs females:  $26.6 \pm 6.7$ ;  $p=0.03$ ). Independently of the different OP, chronological ages recorded a greater number of IE, are (Table 31): 23-24 years old for males (IE: 20.5%;  $n=187$ ) and 17-18 years old for females (IE: 22.7% ;  $n=174$ ). With the numbers available (Table 3), exclusively during the second OP, seems to exist a sufficiently high injury prevalence in anatomical locations (OSICS-1) or injury types (OSICS-2), as for consider a behavior susceptible to be dependent. ~~Therefore, the chronological age seems to condition a~~



specific injury pattern related to determined anatomical locations or injury types (Table 5 (males: OR=2.62 / females: OR=3.07)).

Table 3-1. Injury episodes according to chronological age groups, related to sex and two Olympic periods.

| Chronological age | Males           |      |                 |      | Females         |      |                 |      |
|-------------------|-----------------|------|-----------------|------|-----------------|------|-----------------|------|
|                   | 1 <sup>st</sup> |      | 2 <sup>nd</sup> |      | 1 <sup>st</sup> |      | 2 <sup>nd</sup> |      |
|                   | (n)             | (%)  | (n)             | (%)  | (n)             | (%)  | (n)             | (%)  |
| 15                | 3               | 0,8  | 0               | 0,0  | 11              | 3,5  | 4               | 0,9  |
| 16                | 23              | 5,3  | 2               | 0,4  | 38              | 12,2 | 22              | 4,8  |
| 17                | 25              | 5,8  | 22              | 4,6  | 58              | 18,6 | 30              | 6,6  |
| 18                | 23              | 5,3  | 38              | 7,9  | 30              | 9,6  | 56              | 12,3 |
| 19                | 31              | 7,2  | 53              | 11,0 | 17              | 5,5  | 44              | 9,7  |
| 20                | 43              | 10,0 | 49              | 10,2 | 4               | 1,3  | 62              | 13,6 |
| 21                | 57              | 13,2 | 37              | 7,6  | 18              | 5,8  | 53              | 11,6 |
| 22                | 42              | 9,7  | 24              | 5,0  | 26              | 8,4  | 42              | 9,3  |
| 23                | 65              | 15,1 | 41              | 8,5  | 35              | 11,3 | 43              | 9,5  |
| 24                | 44              | 10,2 | 37              | 7,7  | 31              | 10,0 | 28              | 6,2  |
| 25                | 36              | 8,4  | 50              | 10,4 | 23              | 7,4  | 13              | 2,9  |
| 26                | 14              | 3,2  | 59              | 12,3 | 10              | 3,2  | 16              | 3,5  |
| 27                | 17              | 3,9  | 37              | 7,7  | 10              | 3,2  | 22              | 4,8  |
| 28                | 6               | 1,4  | 11              | 2,3  | 0               | 0,0  | 11              | 2,4  |
| 29                | 2               | 0,5  | 9               | 1,9  | 0               | 0,0  | 7               | 1,5  |
| 30                | 0               | 0,0  | 12              | 2,5  | 0               | 0,0  | 0               | 0,0  |
| 31                | 0               | 0,0  | 0               | 0,0  | 0               | 0,0  | 2               | 0,4  |

n: number of injury episodes; 1<sup>st</sup> (1997 - 2000); 2<sup>nd</sup> (2001-2004).

### Weight category

Independently of the OP analysed, the male weight category group which has more IE, is the under 58 kg (IE: 35.6%; n=325). Then, from 58 to 68 kg (IE: 30.9%; n=282), from 68 to 80 kg (IE: 17.6%; n=160), and more than 80 kg (IE: 15.9%; n=145). In females, is the light weight category from 49 to 57 kg the one with more IE (IE: 30.9%; n=237). The next distribution per weight groups is: from 57 to 67 kg (IE: 30.2%; n=231), under 49 kg (IE: 29.9%; n=229), and more than 67 kg (IE: 9.0%; n=69).

Significant differences ( $p=0.0301$ ), were found between sexes in all weight categories (in the very light and heavy weight categories during the first OP, and in the light and

medium weight category during the second OP) and between OP in the same sex: females in very light and heavy weight categories and males in light and medium weight categories. ~~Once again, with the available data, Except in the first OP, OSICS-2 in males (Table 3),~~ seems to exist a sufficiently high injury prevalence in anatomical locations (OSICS-1) or injury types (OSICS-2) to consider ~~a behavior susceptible to be dependent. Therefore,~~ the weight category ~~should be considered~~ as a injury risk factor ~~or a possible behavior dependent generator (Table 5(males: OR=2.02 / females: OR=1.50)).~~

### Annual quarter

From the total of 912 IE generated by the males (Table 42), 35.7% (n=326) were sustained for the athletes in the first annual quarter, 26.3% (n=240) in the second annual quarter, 15.3% (n=139) in the third annual quarter, and 22.7% (n=207) in the fourth annual quarter. From the total of 766 IE generated by the females (Table 42), 33.0% (n=253) were sustained for the athletes in the first annual quarter, 31.1% (n=238) in the second annual quarter, 14.5% (n=111) in the third annual quarter, and 21.4% (n=164) in the fourth annual quarter.

Table 4-2. Injury episodes according to the months when injury occurred, related to sex and two Olympic periods.

Formatted Table

| Months   | Males           |      |                 |      | Females         |      |                 |      |
|----------|-----------------|------|-----------------|------|-----------------|------|-----------------|------|
|          | 1 <sup>st</sup> |      | 2 <sup>nd</sup> |      | 1 <sup>st</sup> |      | 2 <sup>nd</sup> |      |
|          | (n)             | (%)  | (n)             | (%)  | (n)             | (%)  | (n)             | (%)  |
| January  | 43              | 10,0 | 47              | 9,8  | 47              | 15,1 | 51              | 11,2 |
| February | 55              | 12,8 | 72              | 15,0 | 26              | 8,4  | 47              | 10,3 |
| March    | 59              | 13,7 | 50              | 10,4 | 35              | 11,3 | 47              | 10,3 |
| April    | 42              | 9,7  | 50              | 10,4 | 40              | 12,9 | 53              | 11,6 |
| May      | 52              | 12,1 | 54              | 11,2 | 48              | 15,4 | 64              | 14,1 |
| June     | 29              | 6,7  | 13              | 2,7  | 13              | 4,2  | 20              | 4,4  |
| July     | 7               | 1,6  | 30              | 6,2  | 4               | 1,3  | 8               | 1,8  |
| August   | 18              | 4,2  | 13              | 2,7  | 24              | 7,7  | 23              | 5,2  |

|           |    |     |    |      |    |     |    |      |
|-----------|----|-----|----|------|----|-----|----|------|
| September | 31 | 7,2 | 40 | 8,3  | 20 | 6,4 | 32 | 7,0  |
| October   | 39 | 9,0 | 31 | 6,4  | 28 | 9,0 | 36 | 7,9  |
| November  | 42 | 9,7 | 63 | 13,1 | 15 | 4,8 | 48 | 10,5 |
| December  | 14 | 3,3 | 18 | 3,8  | 11 | 3,5 | 26 | 5,7  |

n: number of injury episodes; 1<sup>st</sup> (1997-2000); 2<sup>nd</sup> (2001-2004).

Formatted Table

No differences were found between sexes or OP. Excluding the results obtained by male taekwondists during the first OP, (Table 3), the annual quarter seems to condition a significant prevalence of injury anatomical site (OSICS-1) and injury type (OSICS-2), and could be considered as a injury risk factor (Table 5 males: OR=2.04 / females: OR=1.71).

Formatted: Font color: Auto

Formatted: Font color: Auto

### Injury timing

From the total of 1678 IE, 61.1% were sustained or during training sessions or out of competition (n=1026), 23.3% in pre-competition period (n=391) and 15.6% in competition or post-competition period (n=261). No differences exist between OP according to the number of IE. ~~In males, there~~ There is no significant relationship between injury timing and injury anatomical sites (OSICS-1) or injury types (OSICS-2). Therefore, with the numbers available, ~~only in females this variable~~ injury timing should ~~not~~ be considered as a ~~injury~~ risk factor ~~or a possible behavior-dependent generator of injuries in elite Taekwondo athletes~~ (Table 53).

### Competition difficulty level

From the total of 367 IE derived from competition in males, 45.2% (n=166) were sustained during NC, 14.4% (n=53) during EUC, 27.2% (n=100) during WC, and 13.1% (n=48) during WCU. From the total of 286 IE derived from competition in females, 38.8% (n=111) were sustained during NC, 17.5% (n=50) during EUC, 25.5% (n=73) during WC, and 18.2% (n=52) during WCU. No differences exist between OP

according to the number of IE in relation to the competition difficulty level. There is no significant relationship between competition difficulty level and injury anatomical sites (OSICS-1) or injury types (OSICS-2). These results are independent of whether the injury has occurred pre or post-competition (Table 5.3). So, with current data, the competition difficulty level should not be considered as a risk factor or a possible behavior-dependent generator of injuries in elite Taekwondo athletes.

Table 5.3. Statistical dependency levels of independent variables according to sex and two different Olympic periods.

|                   | Sex     | OSICS           | Olympic period  | IE (n)          | df    | $\chi^2$     | $P_{adjusted}$ |                 |
|-------------------|---------|-----------------|-----------------|-----------------|-------|--------------|----------------|-----------------|
| Chronological age | Males   | 1               | 1 <sup>st</sup> | 431             | 24    | 43.04        | <u>0.005</u>   |                 |
|                   |         | 2               |                 |                 | 22    | 40.99        | <u>0.005</u>   |                 |
|                   |         | 1               | 2 <sup>nd</sup> |                 | 481   | 24           | 48.71          | <u>0.001 *</u>  |
|                   |         | 2               |                 |                 |       | 22           | 49.81          | <u>0.001 *</u>  |
|                   | Females | 1               | 1 <sup>st</sup> | 311             |       | 24           | 128.63         | <u>0.00+002</u> |
|                   |         | 2               |                 |                 |       | 22           | 44.26          | <u>0.003</u>    |
| 1                 |         | 2 <sup>nd</sup> | 455             |                 | 24    | 114.98       | <u>0.001 *</u> |                 |
| 2                 |         |                 |                 |                 | 22    | 78.56        | <u>0.001 *</u> |                 |
| Weight category   | Males   | 1               |                 | 1 <sup>st</sup> | 431   | 36           | 131.56         | <u>0.001 *</u>  |
|                   |         | 2               |                 |                 |       | 33           | 53.38          | <u>0.005</u>    |
|                   |         | 1               | 2 <sup>nd</sup> | 481             |       | 36           | 348.18         | <u>0.001 *</u>  |
|                   |         | 2               |                 |                 |       | 33           | 188.11         | <u>0.001 *</u>  |
|                   | Females | 1               | 1 <sup>st</sup> |                 | 311   | 36           | 140.39         | <u>0.001 *</u>  |
|                   |         | 2               |                 |                 |       | 33           | 86.83          | <u>0.001 *</u>  |
|                   |         | 1               | 2 <sup>nd</sup> | 455             |       | 36           | 170.15         | <u>0.001 *</u>  |
|                   |         | 2               |                 |                 |       | 33           | 128.78         | <u>0.001 *</u>  |
| Annual quarter    | Males   | 1               | 1 <sup>st</sup> |                 | 431   | 36           | 34.57          | <u>0.500</u>    |
|                   |         | 2               |                 |                 |       | 33           | 27.50          | <u>0.700</u>    |
|                   |         | 1               | 2 <sup>nd</sup> | 481             |       | 36           | 245.14         | <u>0.001 *</u>  |
|                   |         | 2               |                 |                 |       | 33           | 110.42         | <u>0.001 *</u>  |
|                   | Females | 1               | 1 <sup>st</sup> |                 | 311   | 36           | 114.17         | <u>0.001 *</u>  |
|                   |         | 2               |                 |                 |       | 33           | 72.07          | <u>0.001 *</u>  |
|                   |         | 1               | 2 <sup>nd</sup> | 455             |       | 36           | 83.60          | <u>0.001 *</u>  |
|                   |         | 2               |                 |                 |       | 33           | 72.89          | <u>0.001 *</u>  |
| Injury timing     | Males   | 1               | 1 <sup>st</sup> |                 | 431   | 24           | 29.59          | <u>0.150</u>    |
|                   |         | 2               |                 |                 |       | 22           | 19.09          | <u>0.600</u>    |
|                   |         | 1               | 2 <sup>nd</sup> | 481             |       | 24           | 19.13          | <u>0.700</u>    |
|                   | 2       | 22              |                 |                 | 25.75 | <u>0.250</u> |                |                 |
|                   | Females | 1               | 1 <sup>st</sup> |                 | 311   | 24           | 82.50          | <u>0.00+002</u> |
|                   |         | 2               |                 | 22              |       | 33.43        | <u>0.050</u>   |                 |
| 1                 |         | 2 <sup>nd</sup> | 455             | 24              |       | 131.80       |                |                 |

Formatted Table

1  
2  
3  
4  
5  
6  
7  
8  
9  
10  
11  
12  
13  
14  
15  
16  
17  
18  
19  
20  
21  
22  
23  
24  
25  
26  
27  
28  
29  
30  
31  
32  
33  
34  
35  
36  
37  
38  
39  
40  
41  
42  
43  
44  
45  
46  
47  
48  
49  
50  
51  
52  
53  
54  
55  
56  
57  
58  
59  
60

| Competition difficulty level |                 |                 |                 |       |       | 0.00+002 |       |
|------------------------------|-----------------|-----------------|-----------------|-------|-------|----------|-------|
|                              |                 |                 |                 |       |       |          |       |
| Competition difficulty level | Males           | Pre             | 2               | 22    | 69.65 | 0.010    |       |
|                              |                 |                 | 1               | 36    | 41.56 | 0.200    |       |
|                              |                 | 1 <sup>st</sup> | 102             | 33    | 22.01 | 0.900    |       |
|                              |                 |                 | 2               | 36    | 44.7  | 0.100    |       |
|                              |                 | 2 <sup>nd</sup> | 106             | 33    | 27.41 | 0.700    |       |
|                              | 1               |                 | 36              | 27.82 | 0.850 |          |       |
|                              | Females         | Post            | 1 <sup>st</sup> | 82    | 33    | 24.29    | 0.850 |
|                              |                 |                 |                 | 1     | 36    | 28.80    | 0.750 |
|                              |                 | 2 <sup>nd</sup> | 76              | 33    | 33.76 | 0.400    |       |
|                              |                 |                 | 1               | 36    | 40.83 | 0.250    |       |
| Pre                          |                 | 1 <sup>st</sup> | 86              | 33    | 40.27 | 0.150    |       |
|                              | 1               |                 | 36              | 42.67 | 0.200 |          |       |
| Females                      | 2 <sup>nd</sup> | 1 <sup>st</sup> | 97              | 33    | 12.53 | 0.990    |       |
|                              |                 |                 | 1               | 36    | 15.46 | 0.990    |       |
|                              | 2 <sup>nd</sup> | 1 <sup>st</sup> | 40              | 33    | 17.98 | 0.975    |       |
|                              |                 |                 | 1               | 36    | 22.37 | 0.950    |       |
| 2 <sup>nd</sup>              | 2 <sup>nd</sup> | 63              | 33              | 19.62 | 0.950 |          |       |

OSICS: (1) injury location, (2) injury type; IE: injury episodes; n: number of injury episodes; *df*: degrees of freedom;  $\chi^2$ : chi-square statistic;  $p^*$  *p*<sub>adjusted</sub>: significance level  $\leq 0.001$ ; Pre: 1<sup>st</sup> (1997 - 2000); 2<sup>nd</sup> (2001-2004).

Formatted Table

For peer review only

## DISCUSSION

The present study examine the effect of chronological age, weight category, annual quarter, injury timing, and competition difficulty level on injury location and type in elite Taekwondo athletes. The anatomical sites with more injury incidence correspond to the lower limbs (knee, foot, ~~thigh~~, ankle, thigh and lower leg) for both males and females. These anatomical locations are related to different injury types, prevailing contusions, joint and cartilage injuries and, in smaller proportion, tendon and muscle injuries. Chronological age ~~and~~, weight category and annual quarter, are the unique variables that ~~independently to sex and Olympic period~~, show a statistically significant relation as possible injury risk factors in elite taekwondo. In the opposite direction, the injury timing and competition difficulty level does not seem to have any relationship with the injury prevalence in this combat sport. ~~Annual quarter and injury timing show different possible dependent behaviors according to each sex or different Olympic periods.~~

The present study has some limitations to be considered. First, and perhaps the most important, not correspond to a prospective and/or longitudinal study design (it was not possible, for example, to determine when the injury exactly occurred, or to calculate injury rates with adequate accuracy, or to possess previous injury information, or a training load indicator). Second, despite the high number of IE, there is a low number of elite taekwondists included that can possibly result in relevant bias.

### *Injury location (OSICS-1) and injury type (OSICS-2)*

Spanish males taekwondists present higher IE than women, however there is no statistically proven difference found. Recent studies reported similar findings [29-35]. Past research cites the most common injury locations as the lower limb [17, 24, 31, 32, 34, 38, 39]. This is not surprising due to the use of the lower limb as the primary

1  
2  
3  
4  
5  
6 striking weapon. There are no significance differences between sexes in knee injuries,  
7  
8 that's a surprising finding because according to many research papers being a female is  
9  
10 a risk factor to suffer from more knee injuries [40-42]. It could be possible that this risk  
11  
12 factor is minimized because both sexes train and do the same prevention programs, an  
13  
14 uncommon aspect in other sports. Foot is the second location with more number of  
15  
16 episodes, not rear if we know that the majority of kick techniques use the foot. Some  
17  
18 authors affirm that 98 out of 100 hundred kicking techniques are executed with the foot  
19  
20 [43, 44]. Chest, thoracic column and abdomen are the locations with less number of  
21  
22 episodes, it could be related to the use of protections in these zones during training  
23  
24 sessions and competitions. The prevalence of contusions, joint and cartilage injuries, is  
25  
26 in accordance with the related literature [26, 30]. It's logical because the practitioners  
27  
28 are constantly kicking each other.

### 29 30 ***Risk factors (depenent variables)***

31  
32 According to sex, the highest injury prevalence occurs at different chronological ages.  
33  
34 From 23 to 24 years old in males, from 17 to 18 years old in females. There are many  
35  
36 related studies that found a significance correlation between chronological age and  
37  
38 injury incidence [16, 22, 24, 35-37]. The data of this study confirm the same results,  
39  
40 indicating the chronological age as a potential risk factor for injury incidence in elite  
41  
42 taekwondo athletes.

43  
44 Sex differences according to the weight category is a clear indicator that men  
45  
46 suffer more injuries in all weight categories with the exception of intermediate category.  
47  
48 This exception is explained by the fact that there are fewer cases of male taekwondo  
49  
50 athletes represented. Moreover, ~~independently of sex or Olympic period~~, the weight  
51  
52 category emerges as a possible injury risk factor.  
53  
54  
55  
56  
57  
58  
59  
60

1  
2  
3  
4  
5  
6 Finally, the injury risk factors related to the variables of annual quarters, and  
7 especially, injury timing, varies according to sex. Indeed, only in the case of female  
8 taekwondists, the injury timing emerges as an important risk factor to consider in  
9 training and competition strategies. These results are relevant because the SNT trains  
10 in CAR (men and women) under the same workload and intensity, they share  
11 equipment, training systems and prevention methods. This should to minimize the  
12 differences between sexes, but this not always happen, as occurs in the case of injury  
13 timing.  
14  
15  
16  
17  
18  
19  
20  
21

22  
23 All sports planning training system varies depending on the competitive calendar  
24 and, consequently, on the season annual periods. In the present study, this fact seems to  
25 condition the injury pattern of taekwondo athletes, and it can be considered as a risk  
26 factor by coaches and sports medicine specialists.  
27  
28  
29  
30

31 Finally, in all the variables that could be considered as risk factors were recorded  
32 some differences according to sex and/or different OP. The first OP, regarding to  
33 chronological age ( males and females, and OSICS-1 and OSICS-2) , the weight  
34 category (males OSICS-2), and specially in the annual period (males OSICS-1 and  
35 OSICS-2), seems to record a different behavior as a risk factor injuries causes. Although  
36 the retrospective nature of this study the training load was not recorded, it is known that  
37 the Spanish responsible coaches were different during the two analyzed OP. Different  
38 training systems, applied in a certain way for both genders, could be on of the reasons  
39 for these results. Therefore, each sporting context should be specifically analyzed to  
40 assess the full dimension of the elite injury epidemiology in taekwondo.  
41  
42  
43  
44  
45  
46  
47  
48  
49  
50

## 51 CONCLUSIONS

52  
53  
54 The anatomical sites with more injury incidence correspond to the knee, foot, ankle,  
55 thigh, ankle, and lower leg. In SNT prevailing contusions, joint and cartilage injuries.  
56  
57  
58  
59  
60



Chronological age ~~and~~ weight category ~~always, and annual quarter~~ show a statistically significant relation as possible injury risk factors. ~~Annual quarter and injury timing show different possible dependent behaviors~~ according to sex or different OP. The present study has some limitations to be considered: not correspond to a prospective and/or longitudinal study design; despite the high number of IE, there is a low number of elite taekwondists included. This study provide epidemiological information that will help to inform future injury surveillance studies. Further research is needed to achieve a better understanding of elite taekwondo, in relation to sex and competitive categories different training systems.

#### What are the new findings?

- OSICS classification appears to be sensitive to classifying the injury location and type, and to discriminate potential injury risk factors.
- Lower limb injuries including knee, foot, ankle, thigh, ~~ankle~~ and lower leg, are more common than upper limb injuries.
- Contusions, joint and cartilage injuries and, in smaller proportion, tendon and muscle injuries, are the prevailing anatomical types of injury.
- Chronological age, weight category and the ~~weight categories~~ annual quarter can be considered as risk factors to sustain injuries in elite taekwondo according to their location and type.
- ~~There are some injury risk factors associated with female elite taekwondists and not with their male counterparts (injury timing). All recorded risk factors are likely to have a greater or lesser dependence according to gender or different OP registered.~~

Formatted: Font: 6 pt

#### How might it impact on clinical practice in the near future?

- Clinicians taking care of athletes are now aware of different patterns of injuries in Taekwondo practitioners.
- It can start the development of prevention strategies and recommendations to reduce the number of injuries in taekwondo.
- ~~Training all the subjects together regardless the sex can be a factor to be implemented in other sports to assess whether the differences between them are reduced, or not. Although the results described here and that we can use as a guide, each sporting context, adjusted to each training system must be analysed specifically.~~

Formatted: Font: 8 pt

#### ACKNOWLEDGMENTS

Formatted: Space Before: 3 pt, After: 0 pt

1  
2  
3  
4  
5  
6 The authors would like to express their gratitude to the athletes who participated in the  
7 study, as well as to the technical staff and medical department of the National  
8 Taekwondo Federation.  
9

Formatted: Space Before: 3 pt

## 10 11 12 13 FOOTNOTES

Formatted: Space Before: 3 pt, After: 0 pt

14 **Contributorship statement:** All the authors contributed in a substantial manner to the  
15 planning and conduction of the testing, literature review and/or manuscript preparation.  
16 Conceived and designed: AAB, FD, AI. Analysed the data: AAB, JBM, AI. Contributed  
17 reagents/materials/analysis tools: AAB, LT, JBM, AI. Wrote the paper: AAB, FD, NM,  
18 AI. They all gave final approval of the version submitted.  
19  
20  
21  
22

Formatted: Space Before: 3 pt

23 **Funding:** The study was supported by grants from the Agency for Management of  
24 University and Research Grants (AGAUR) the Catalan National Institute of Physical  
25 Education (Institut Nacional d'Educació Física de Catalunya) and the High Performance  
26 Centre (Centre Alt Rendiment Esportiu), Generalitat de Catalunya; resolution :  
27 VCP/3346/2009.  
28  
29  
30

31 **Competing interests:** None.  
32

33 **Ethics approval:** The study protocol was approved by the Ethics Sports Clinical  
34 Investigations Committee.  
35  
36

37 **Data sharing statement:** Extra data is available by emailing AAB.  
38  
39  
40  
41  
42  
43  
44  
45  
46  
47  
48  
49  
50  
51  
52  
53  
54  
55  
56  
57  
58  
59  
60

## REFERENCES

- 1-World-Taekwondo-Federation. [http://www.wtf.org/wtf\\_eng/main/main\\_eng.html](http://www.wtf.org/wtf_eng/main/main_eng.html).  
Accessed [29/04/13].
- 2-Heller J, Peric T, Dlouha R, et al. Physiological profiles of male and female taekwondo (ITF) black belts. *J Sports Sci* 1998;**16**:243-49.
- 3-Gao B. Research on the somatotype features of chine elite male taekwondo athletes. *Sport Science* 2001;**21**:58-61.
- 4-Melhim A. Aerobic and anaerobic power responses to the practice of taekwondo. *Br J Sports Med* 2001;**35**:231-35.
- 5-Ball N, Nolan E, Wheeler K. Anthropometrical, physiological, and tracked power profiles of elite taekwondo athletes 9 weeks before the olympic competition phase. *Journal of Strength and Conditioning Research / National Strength & Conditioning Association* 2011;**25**(10):2752-63.
- 6-Estevan I, Alvarez O, Falco, C, Molina-Garcia J, et al. Impact force and time analysis influenced by execution distance in a roundhouse kick to the head in taekwondo. *Journal of Strength and Conditioning Research / National Strength & Conditioning Association* 2011;**25**(10):2851-56.
- 7-Grosser M, Brüggemann P, Zintl F. *Alto rendimiento: planificación y desarrollo*. Madrid: Martínez Roca, 1989.
- 8-González de Prado C. *Caracterización técnico-táctica de la competición de combate de alto nivel en taekwondo. efectividad de las acciones tácticas* [dissertation]. Barcelona, Universitat de Barcelona, 2011.

- 1  
2  
3  
4  
5  
6 9-Bridge CA, Jones MA, Drust B. The activity profile in international taekwondo  
7 competition is modulated by weight category. *International Journal of Sports*  
8 *Physiology and Performance* 2011;**6**(3):344-57.  
9  
10  
11  
12  
13 10-Cular D, Krstulovic S, Tomljanovic M. The differences between medalists and non  
14 medalists at the 2008 olympic games taekwondo tournament. *Human Movement*  
15 *2011*;**12**(2):165-70.  
16  
17  
18  
19  
20 11-Hardy L, Jones G, Gould D, eds. *Understanding psychological preparation for*  
21 *sport*. New York: John Wiley and Sons, 1996.  
22  
23  
24  
25 12-Falcó C, Alvarez O, Castillo I, et al. Influence of the distance in a roundhouse kick's  
26 execution time and impact force in taekwondo. *J Biomech* 2009;**42**(3):242-48.  
27  
28  
29  
30 13-González de Prado C, Iglesias X, Mirallas J, et al. Sistematización de la acción  
31 táctica en el taekwondo de alta competición. *Apunts. Educación Física y Deportes*  
32 *2011*;**103**:56-67.  
33  
34  
35  
36  
37 14-Junge A, Engebretsen L, Alonso JM, et al. Injury surveillance in multi-sport events:  
38 The international olympic committee approach. *Br J Sports Med* 2008;**42**(6):413-  
39 21.  
40  
41  
42  
43 15-Feehan M, Waller AE. Precompetition injury and subsequent tournament  
44 performance in full-contact taekwondo. *Br J Sports Med* 1995;**29**(4):258-62.  
45  
46  
47  
48 16-Beis K, Tsaklis P, Pieter W, et al. Taekwondo competition injuries in greek young  
49 and adult athletes. *European Journal Sports Traumatology and Related Research*  
50 *2001*;**23**:130-36.  
51  
52  
53  
54  
55  
56  
57  
58  
59  
60

- 1  
2  
3  
4  
5  
6 17-Lystad RP, Pollard H, Graham PL. Epidemiology of injuries in competition  
7  
8 taekwondo: A meta-analysis of observational studies. *Journal of Science and*  
9  
10 *Medicine in Sport / Sports Medicine Australia* 2009;**12**(6):614-21.  
11  
12  
13 18-Schluter-Brust K, Leistenschneider P, Dargel J, et al. Acute injuries in taekwondo.  
14  
15 *Int J Sports Med* 2011;**32**(8):629-34.  
16  
17  
18 19-Kazemi M. Relationships between injury and success in elite taekwondo athletes. *J*  
19  
20 *Sports Sci* 2012;**30**(3):277-83.  
21  
22  
23 20-Pieter W, Fife GP, O'Sullivan DM. Competition injuries in taekwondo: A literature  
24  
25 review and suggestions for prevention and surveillance. *Br J Sports Med*  
26  
27 2012;**46**(7):485-91.  
28  
29  
30 21-Engebretsen L, Soligard T, Steffen K, et al. Sports injuries and illnesses during the  
31  
32 London Summer Olympic Games 2012. *Br J Sports Med* 2013;**47**:407-14.  
33  
34  
35 22-Pieter W, Zemper ED. Head and neck injuries in young taekwondo athletes. *The J*  
36  
37 *Sports Med Phys Fitness* 1999b;**39**(2):147-53.  
38  
39  
40 23-Zetou E. Injuries in taekwondo athletes. *Physical Training*.  
41  
42 [http://ejmas.com/pt/2006pt/ptart\\_Zetou\\_0906.html](http://ejmas.com/pt/2006pt/ptart_Zetou_0906.html) (accessed 30 May 2013).  
43  
44  
45 24-Kazemi M., Shearer H, Choung YS. Pre-competition habits and injuries in  
46  
47 taekwondo athletes. *BMC Musculoskeletal Disorders* 2005;**6**:26.  
48  
49  
50 25-Pieter W. Taekwondo. In: Kordi R, Mafulli N, Wroble RR, Wallace WA, eds.  
51  
52 *Combat sports medicine*. London: Springer, 2009:263-86.  
53  
54  
55  
56  
57  
58  
59  
60

- 1  
2  
3  
4  
5  
6 26-Til L, Orchard J, Rae K. El sistema de classificació i codificació OSICS-10 traduït  
7 de l'anglès. *Apunts Medicina De L'Esport* 2008;**43**(159), 109.  
8  
9  
10  
11 27- Directive 95/46/EC of the European Parliament and of the Council of 24 October  
12 1995 on the protection of individuals with regard to the processing of personal data  
13 and on the free movement of such data, OJ L 281, 23.11.1995, p.31.  
14  
15  
16  
17  
18 28-Hagglund M, Walden M, Bahr R, et al. Methods for epidemiological study of  
19 injuries to professional football players: Developing the UEFA model. *Br J Sports*  
20 *Med* 2005;**39**(6):340-46.  
21  
22  
23  
24  
25 29-Birrer RB. Trauma epidemiology in the martial arts. the results of an eighteen-year  
26 international survey. *Am J Sports Med* 1996;**24**(6 Suppl):S72-9.  
27  
28  
29  
30 30-Kazemi M, Pieter W. Injuries at the canadian national taekwon do championships:  
31 A prospective study. *BMC Musculoskeletal Disorders* 2004;**5**:22.  
32  
33  
34  
35 31-Pieter W, Van Ryssegem G, Lufting R, et al. Injury situation and injury mechanism  
36 at the 1993 european taekwondo cup. *Journal of Human Movement Studies*  
37 1995;**28**(1):1-24.  
38  
39  
40  
41 32-Pieter W, Bercades LT, Heijmans J. Injuries in young and adult taekwondo athletes.  
42 *Kines* 1998;**30**(1):22-30.  
43  
44  
45  
46 33-Pieter W, Zemper ED. Injuries in adult american taekwondo athletes. *Fifth IOC*  
47 *World Congress on Sports Sciences*; 31 October-15 November 1999, Sydney.  
48 Australia. 1999a.  
49  
50  
51  
52  
53 34-Zemper ED, Pieter W. Injury rates during the 1988 US olympic team trials for  
54 taekwondo. *Br J Sports Med* 1989;**23**(3):161-64.  
55  
56  
57  
58  
59  
60

- 1  
2  
3  
4  
5  
6 35-Zetaruk MN, Violan MA, Zurakowski D, et al. Injuries in martial arts: A comparison  
7 of five styles. *Br J Sports Med* 2005;**39**(1):29-33.  
8  
9  
10  
11 36-Kazemi M, Chudolinski A, Turgeon M, et al. Nine year longitudinal retrospective  
12 study of taekwondo injuries. *The Journal of the Canadian Chiropractic Association*  
13 2009;**53**(4):272-81.  
14  
15  
16  
17 37-Siana J, Borum P, Kryger H. Injuries in taekwondo. *Br J Sports Med*  
18 1986;**20**(4):165-66.  
19  
20  
21  
22 38-Cunningham C, Cunningham S. Injury surveillance at a national multi-sport event.  
23 *Aust J Sci Med Sport* 1996;**28**(2):50-56.  
24  
25  
26  
27 39-Kim EH, Kim YS, Toun SW, et al. Survey and analysis of sports injuries and  
28 treatment patterns among korean national athletes. *Korean Journal Sports Science*  
29 1994;**6**(1):33-56.  
30  
31  
32  
33 40-Myklebust G, Maehlum S, Holm I, et al. A prospective cohort study of anterior  
34 cruciate ligament injuries in elite norwegian team handball. *Scand J Med Sci Sports*  
35 1998;**8**(3):149-53.  
36  
37  
38  
39 41-Myklebust G, Engebretsen L, Braekken IH, et al. Prevention of anterior cruciate  
40 ligament injuries in female team handball players: A prospective intervention study  
41 over three seasons. *Clinical Journal of Sport Medicine : Official Journal of the*  
42 *Canadian Academy of Sport Medicine* 2003;**13**(2):71-78.  
43  
44  
45  
46 42-Soderman K., Alfredson H, Pietila T, et al. Risk factors for leg injuries in female  
47 soccer players: A prospective investigation during one out-door season. *Knee Surg*  
48 *Sports Traumatol Arthrosc* 2001;**9**(5):313-21.  
49  
50  
51  
52  
53  
54  
55  
56  
57  
58  
59  
60

1  
2  
3  
4  
5  
6  
7  
8  
9  
10  
11  
12  
13  
14  
15  
16  
17  
18  
19  
20  
21  
22  
23  
24  
25  
26  
27  
28  
29  
30  
31  
32  
33  
34  
35  
36  
37  
38  
39  
40  
41  
42  
43  
44  
45  
46  
47  
48  
49  
50  
51  
52  
53  
54  
55  
56  
57  
58  
59  
60

43-Kazemi M, Waalen J, Morgan C, et al. A profile of olympic taekwondo competitors.  
*Journal of Sports Science and Medicine (CSSI)* 2006;114-21.

44-Kazemi M, Perri G, Soave D. A profile of 2008 olympic taekwondo competitors.  
*The Journal of the Canadian Chiropractic Association* 2010;54(4):243-49.

For peer review only



1  
2  
3  
4  
5  
6  
7  
8  
9  
10  
11  
12  
13  
14  
15  
16  
17  
18  
19  
20  
21  
22  
23  
24  
25  
26  
27  
28  
29  
30  
31  
32  
33  
34  
35  
36  
37  
38  
39  
40  
41  
42  
43  
44  
45  
46  
47  
48  
49  
50  
51  
52  
53  
54  
55  
56  
57  
58  
59  
60

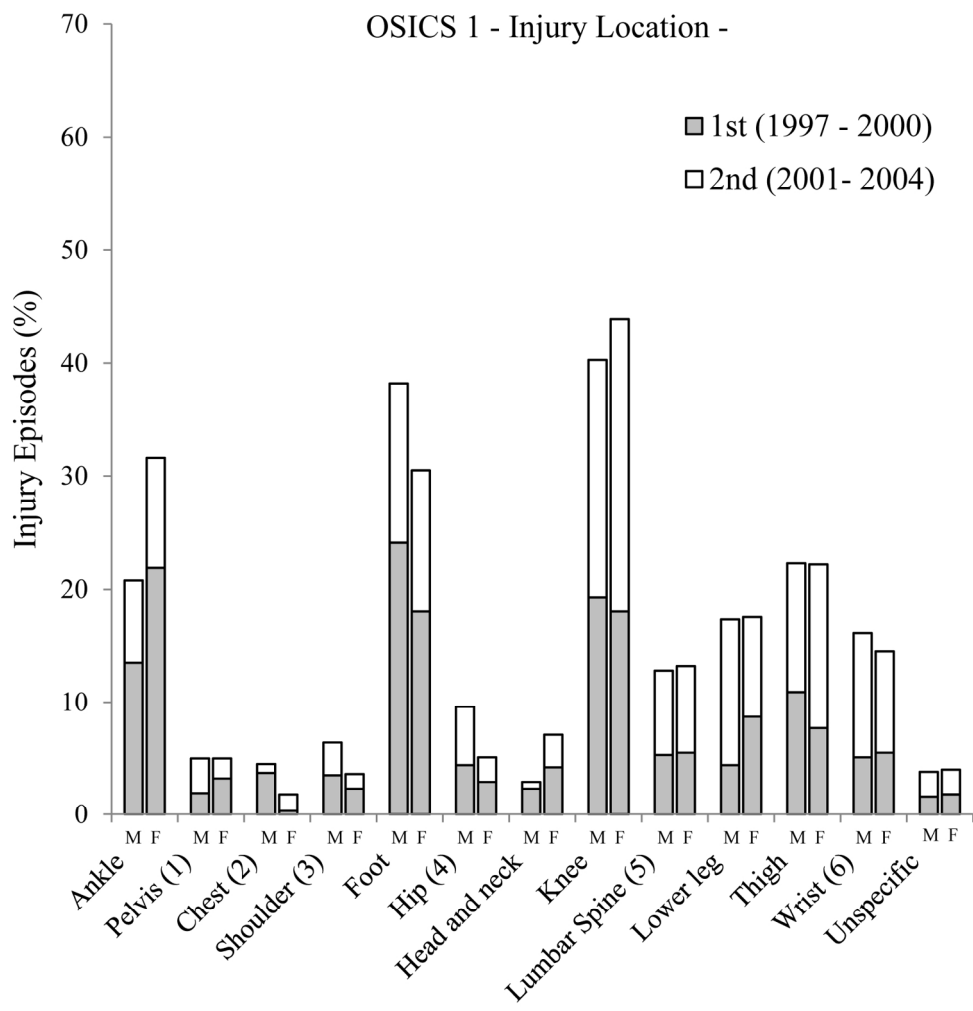

153x155mm (300 x 300 DPI)

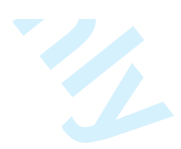

1  
2  
3  
4  
5  
6  
7  
8  
9  
10  
11  
12  
13  
14  
15  
16  
17  
18  
19  
20  
21  
22  
23  
24  
25  
26  
27  
28  
29  
30  
31  
32  
33  
34  
35  
36  
37  
38  
39  
40  
41  
42  
43  
44  
45  
46  
47  
48  
49  
50  
51  
52  
53  
54  
55  
56  
57  
58  
59  
60

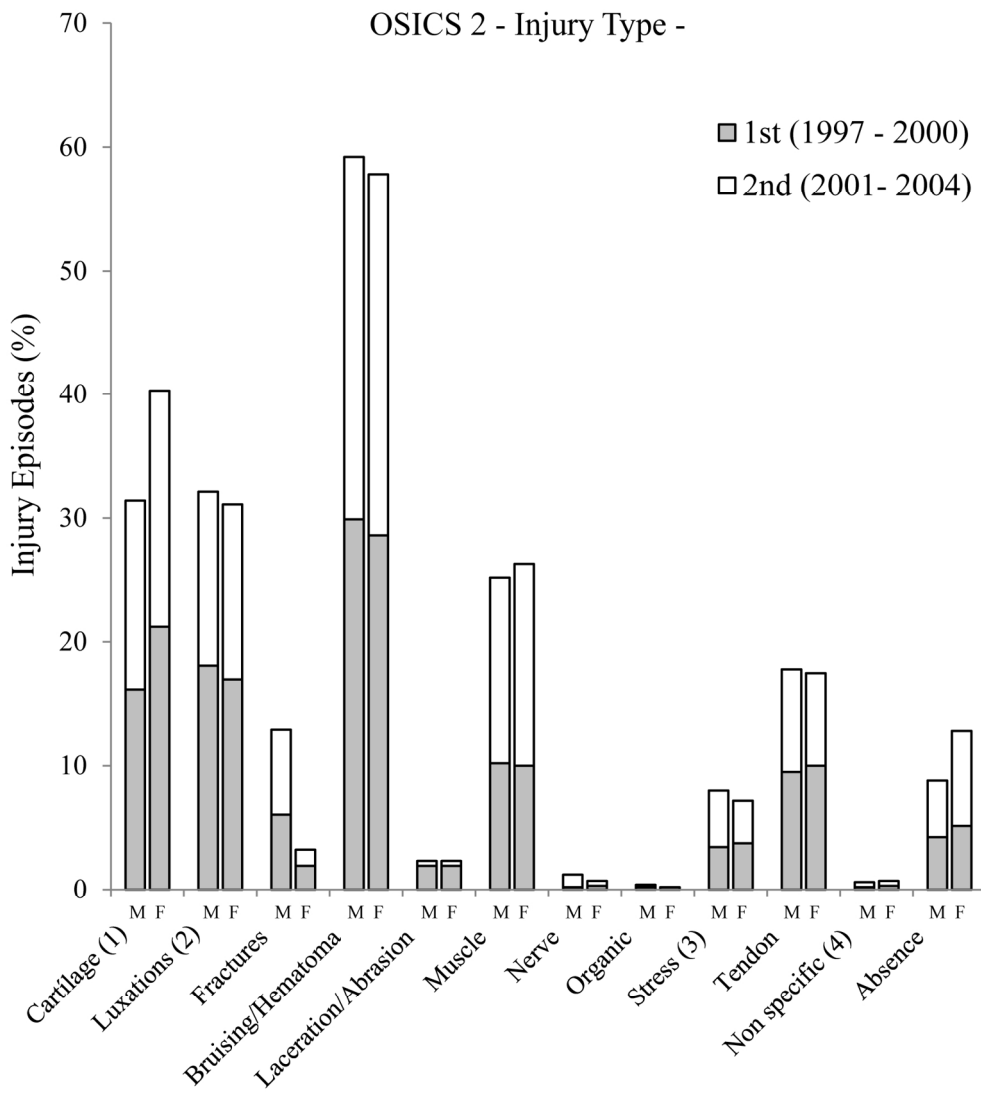

151x166mm (300 x 300 DPI)

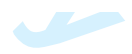

STROBE 2007 (v4) Statement—Checklist of items that should be included in reports of *cross-sectional studies*

| Section/Topic                | Item # | Recommendation                                                                                                                                                                       | Reported on page # |
|------------------------------|--------|--------------------------------------------------------------------------------------------------------------------------------------------------------------------------------------|--------------------|
| Title and abstract           | 1      | (a) Indicate the study's design with a commonly used term in the title or the abstract                                                                                               | 1                  |
|                              |        | (b) Provide in the abstract an informative and balanced summary of what was done and what was found                                                                                  | 2                  |
| <b>Introduction</b>          |        |                                                                                                                                                                                      |                    |
| Background/rationale         | 2      | Explain the scientific background and rationale for the investigation being reported                                                                                                 | 3, 4               |
| Objectives                   | 3      | State specific objectives, including any prespecified hypotheses                                                                                                                     | 3, 4               |
| <b>Methods</b>               |        |                                                                                                                                                                                      |                    |
| Study design                 | 4      | Present key elements of study design early in the paper                                                                                                                              | 4                  |
| Setting                      | 5      | Describe the setting, locations, and relevant dates, including periods of recruitment, exposure, follow-up, and data collection                                                      | 5, 6               |
| Participants                 | 6      | (a) Give the eligibility criteria, and the sources and methods of selection of participants                                                                                          | 5, 6               |
| Variables                    | 7      | Clearly define all outcomes, exposures, predictors, potential confounders, and effect modifiers. Give diagnostic criteria, if applicable                                             | 5, 6               |
| Data sources/<br>measurement | 8*     | For each variable of interest, give sources of data and details of methods of assessment (measurement). Describe comparability of assessment methods if there is more than one group | 5, 6               |
| Bias                         | 9      | Describe any efforts to address potential sources of bias                                                                                                                            | 5, 6               |
| Study size                   | 10     | Explain how the study size was arrived at                                                                                                                                            | 5, 6               |
| Quantitative variables       | 11     | Explain how quantitative variables were handled in the analyses. If applicable, describe which groupings were chosen and why                                                         | 5, 6               |
| Statistical methods          | 12     | (a) Describe all statistical methods, including those used to control for confounding                                                                                                | 7                  |
|                              |        | (b) Describe any methods used to examine subgroups and interactions                                                                                                                  | 7                  |
|                              |        | (c) Explain how missing data were addressed                                                                                                                                          | 7                  |
|                              |        | (d) If applicable, describe analytical methods taking account of sampling strategy                                                                                                   | 7                  |
|                              |        | (e) Describe any sensitivity analyses                                                                                                                                                | 7                  |
| <b>Results</b>               |        |                                                                                                                                                                                      |                    |

|                          |     |                                                                                                                                                                                                              |       |
|--------------------------|-----|--------------------------------------------------------------------------------------------------------------------------------------------------------------------------------------------------------------|-------|
| Participants             | 13* | (a) Report numbers of individuals at each stage of study—eg numbers potentially eligible, examined for eligibility, confirmed eligible, included in the study, completing follow-up, and analysed            | 8     |
|                          |     | (b) Give reasons for non-participation at each stage                                                                                                                                                         | 8     |
|                          |     | (c) Consider use of a flow diagram                                                                                                                                                                           | 8     |
| Descriptive data         | 14* | (a) Give characteristics of study participants (eg demographic, clinical, social) and information on exposures and potential confounders                                                                     | 8     |
|                          |     | (b) Indicate number of participants with missing data for each variable of interest                                                                                                                          | 8     |
| Outcome data             | 15* | Report numbers of outcome events or summary measures                                                                                                                                                         | 8     |
| Main results             | 16  | (a) Give unadjusted estimates and, if applicable, confounder-adjusted estimates and their precision (eg, 95% confidence interval). Make clear which confounders were adjusted for and why they were included | 9-15  |
|                          |     | (b) Report category boundaries when continuous variables were categorized                                                                                                                                    | 9-15  |
|                          |     | (c) If relevant, consider translating estimates of relative risk into absolute risk for a meaningful time period                                                                                             | 9-15  |
| Other analyses           | 17  | Report other analyses done—eg analyses of subgroups and interactions, and sensitivity analyses                                                                                                               | 9-15  |
| <b>Discussion</b>        |     |                                                                                                                                                                                                              |       |
| Key results              | 18  | Summarise key results with reference to study objectives                                                                                                                                                     | 16-18 |
| Limitations              | 19  | Discuss limitations of the study, taking into account sources of potential bias or imprecision. Discuss both direction and magnitude of any potential bias                                                   | 16-18 |
| Interpretation           | 20  | Give a cautious overall interpretation of results considering objectives, limitations, multiplicity of analyses, results from similar studies, and other relevant evidence                                   | 16-18 |
| Generalisability         | 21  | Discuss the generalisability (external validity) of the study results                                                                                                                                        | 19    |
| <b>Other information</b> |     |                                                                                                                                                                                                              |       |
| Funding                  | 22  | Give the source of funding and the role of the funders for the present study and, if applicable, for the original study on which the present article is based                                                |       |

\*Give information separately for cases and controls in case-control studies and, if applicable, for exposed and unexposed groups in cohort and cross-sectional studies.

**Note:** An Explanation and Elaboration article discusses each checklist item and gives methodological background and published examples of transparent reporting. The STROBE checklist is best used in conjunction with this article (freely available on the Web sites of PLoS Medicine at <http://www.plosmedicine.org/>, Annals of Internal Medicine at <http://www.annals.org/>, and Epidemiology at <http://www.epidem.com/>). Information on the STROBE Initiative is available at [www.strobe-statement.org](http://www.strobe-statement.org).
